# Supplementary material for: Repeated vaccination with homologous influenza hemagglutinin broadens human antibody responses to unmatched flu viruses
Source: eLife. 2025 Nov 13;14:e107042. doi: 10.7554/eLife.107042 (PMC12614894; doi:10.7554/eLife.107042)
Supplement: Figure 2—source data 1. — This is the same source data used for Figure 3, Figure 3—figure supplement 1. [file elife-107042-fig2-data1.xlsx]

## Sheet: Sheet1
de-identified subject number	Year	Day	H1Bei95	H1Br07	BBr08	H1Bz78	H3Br07	H1CA09	H1Ch83	BCO17	H1De57	BFL06	H1FM47	H3Fu02	BHar94	BHK01	H3HK14	H3HK68	BLee40	BMA12	BMal04	H3MS85	H3Nan95	H1NC99	H1NJ76	H3NY04	H3Pa99	H3PC73	H3Pe09	BPh13	H1PR34	H1SC18	H3Shan93	H1SI06	H3Sich89	BSich99	H1Si68	H3Sw13	H3Syd97	BTX11	H3TX12	H3TX77	H1TX91	H3Ur07	H1USSR77	H3Vi11	BWI10	H3WI05	BYam88
>50 years old
95	2013	0	20	20	40	5	10	20	5		5	20	5	40	20	40		10	40	80	80	10	40	20	10	10	160	5	10	20	5	20	20	20	10	20	5	40	80	80	20	5	20		5	10	20	160	80
95	2013	21	20	40	80	20	40	160	5		40	160	40	80	320	40		10	160	320	160	40	80	40	20	20	640	5	160	160	20	20	40	20	20	160	10	160	80	320	160	10	5		40	160	80	160	320
95	2014	0	80	20	20			40	20		10	40	10	40	40	40	5	10	40	80	40	40	5	20	40	80	320	20	80	80		40	40	5	40	40	20	5	40	80	40	20	20	10	10	40	40	80	20
95	2014	21	160	40	160			160	80		20	160	40	40	160	160	320	10	80	320	320	160	40	160	160	80	320	40	320	160		80	80	80	160	80	80	640	80	320	80	80	40	320	40	320	80	160	80
95	2015	0	40	40	40			80	5		5	40	10	160	40	20	10	10	40	20	40	40	40	40	20	160	80	5	20	40		20	40	20	40	20	5	20	40	40	80	5	40	10	5	40	20	160	40
95	2015	21	20	40	80			80	5		5	80	20	80	80	40	160	10	80	40	160	160	40	40	40	160	40	20	320	160		20	40	20	40	320	5	640	40	80	640	20	80	40	5	640	80	640	80
95	2016	0	40	40	40	20		40	5		10	80	5		160	80	40	20	40	160	40	20	20	40	20	80	40	10	80	40		20	20	40	40	640	5	160	40	40	320	10	5	10	5	160	160	80	80
95	2016	21	40	40	80	40		160	40		20	160	20		160	160	320	20	80	160	160	20	20	40	80	80	40	20	320	160		40	20	80	40	80	5	320	40	160	640	20	5	40	40	640	160	40	160
110	2013	0	5	5	160			20				320			320	80		80	640	320	320	5		5		40	5	5	5	160				5		160	40	80	5	320	20	5	40			80	320	80	80
110	2013	21	10	10	160			40				320			640	80		80	640	640	160	5		10		80	5	5	40	160				5		320	40	80	5	640	40	5	20			160	160	80	80
110	2014	0	5	5	80			5	40		5	160	40	80	160	160	20	40	320	320	80	40	5	40	5	20	80	20	40	320		40	40	5	40	160	10	5	20	320	40	10	5	80	40	20	320	160	10
110	2014	21	5	5	160			80	160		10	160	80	80	320	160	20	20	320	640	320	80	40	80	40	20	80	40	160	320		40	80	80	160	320	80	160	20	320	40	80	20	160	80	40	160	160	40
110	2015	0	5	10	80			20	20		5	160	40	40	160	80	5	40	160	80	80	5	40	5	20	40	20	5	20	160		5	40	5	20	160	20	40	5	160	40	5	80	40	20	40	80	80	20
110	2015	21	10	5	160			80	20		5	160	40	160	320	80	320	320	320	160	160	20	40	10	40	320	20	20	640	320		5	20	20	20	320	40	640	10	160	1280	5	1280	160	20	640	160	1280	80
110	2016	0	5	5	160	20		40	20		5	80	20		160	80	20	40	160	160	80	10	10	5	20	10	10	20	40	320		20	10	20	20	160	20	80	10	160	80	5	20	20	20	80	160	80	40
110	2016	21	20	20	160	40		80	40		5	320	40		640	160	160	80	640	320	160	20	20	20	40	80	40	20	160	320		40	20	40	40	320	40	640	20	160	640	10	20	80	40	320	320	80	80
8	2013	0	5	5	160	80	160	10	40		40	160	80	80	160	10		40	80	160	80	20	40	160	5	5	40	5	80	80	5	5	20	5	40	160	5		20	160	80	5	80		80	40	320	320	160
8	2013	21	5	5	160	80	320	20	40		20	160	160	160	160	40		20	40	160	80	20	20	5	5	5	40	5	40	80	5	10	10	5	20	160	5		10	160	80	5	5		160	40	160	320	160
8	2014	0	5	10	160			5	80	20	20	160	160	40	160	10	160	40	80	160	80	40	20	5	5	20	40	5	80	40		10	20	5	20	320	10	320	40	320	80	5	320	80	160	160	160	160	160
8	2014	21	5	5	160			10	80	20	40	160	160	40	160	10	80	40	80	160	80	40	20	5	5	20	40	5	80	80		5	20	5	10	320	10	80	40	320	320	5	160	80	160	320	160	320	160
8	2015	0	5	5	160			10	20	40	40	160	160	160	160	20	20	40	40	160	40	20	10	5	5	80	5	5	80	160		5	10	5	10	160	5	80	5	80	80	5	80	80	80	80	320	160	160
8	2015	21	5	5	160			20	40	40	40	80	160	160	160	20	80	40	40	160	40	20	10	5	5	160	10	5	160	160		5	10	5	10	160	5	320	20	80	160	5	160	320	80	160	320	320	320
8	2016	0	5	5	160	80		20	80	40	40	80	80		80	10	160	40	40	80	40	20	40	5	5	80	10	5	160	80		40	20	10	10	80	10	320	5	80	160	5	10	320	80	320	40	320	80
8	2016	21	5	5	160	160		40	80	40	40	160	80		160	10	320	40	40	160	40	20	40	10	5	80	20	5	320	160		40	20	10	10	80	5	640	5	160	320	5	5	320	80	640	80	320	80
129	2013	0	20	5	40	5	20	40	20		5	80	5	40	80	10		20	80	320	80	40	10	20	40	5	80	5	5	80	5	80	10	20	10	80	10	80	10	320	10	10	20		5	20	80	80	40
129	2013	21	20	5	80	5	40	160	5		10	80	10	40	80	20		20	80	320	80	40	10	20	80	5	160	5	40	80	5	160	10	20	20	160	10	160	20	320	80	20	10		5	80	80	160	40
129	2014	0	20	5	20			80	5		10	80	5	40	80	20	10	10	40	160	20	80	5	20	160	10	160	10	20	160		160	10	40	10	80	10	80	10	320	80	10	80	40	5	80	80	160	10
129	2014	21	20	5	80			40	5		10	160	10	40	160	40	20	5	160	640	80	80	20	40	320	20	160	5	40	160		80	10	80	5	160	10	40	10	320	160	10	160	40	5	160	80	80	20
129	2015	0	10	5	40			40	5		5	80	5	40	80	20	40	40	80	80	40	40	10	5	40	40	5	10	5	160		80	10	10	5	80	10	80	5	160	20	5	40	40	5	20	80	80	20
129	2015	21	10	5	80			80	5		5	80	10	40	160	80	40	40	80	80	80	40	5	5	80	20	5	10	10	160		80	10	10	5	160	10	160	5	160	20	5	80	40	5	40	80	80	20
129	2016	0	20	5	40	5		5	5		5	160	5		320	40	5	20	160	160	40	40	10	10	40	10	5	10	20	320		80	10	5	10	160	20	40	20	160	80	5	20	20	5	80	320	40	40
129	2016	21	20	5	40	5		80	5		5	320	5		320	80	20	20	320	320	20	40	10	10	40	10	5	5	40	160		80	10	20	10	320	20	40	20	80	80	5	20	20	5	80	320	20	80
127	2013	0	40	10	40	5	10	10	5		160	20	40	20	20	20		10	20	40	160	40	20	160	160	20	40	5	10	5	40	40	5	80	5	20	80	40	20	40	20	10	10		5	20	5	40	20
127	2013	21	40	20	40	5	10	10	5		160	20	80	20	40	20		10	40	80	80	40	5	160	80	40	40	5	10	10	40	40	5	80	20	20	80	40	20	40	20	20	80		5	20	10	40	40
127	2014	0	160	20	20			5	10		160	20	40	20	20	40	10	5	20	80	40	40	5	320	320	80	80	5	20	20		80	5	80	5	20	20	40	10	40	5	20	160	20	10	5	20	80	10
127	2014	21	80	20	40			10	10		160	40	80	20	40	40	10	5	20	160	40	80	5	640	320	80	80	10	40	40		40	5	320	5	40	20	20	10	80	5	20	160	20	10	5	40	40	20
127	2015	0	80	20	20			5	5		80	20	40	10	20	20	10	20	20	10	40	40	5	20	160	10	5	10	5	20		40	5	80	5	20	80	20	5	40	20	5	20	20	5	20	10	20	20
127	2015	21	80	40	80			40	5		80	80	40	20	80	10	80	20	80	40	80	40	5	40	160	80	5	10	160	80		40	5	80	5	80	80	160	5	80	160	5	320	80	5	160	40	160	40
127	2016	0	40	20	40	10		10	5		80	40	40		80	80	40	20	80	80	20	20	5	40	80	5	5	5	20	80		40	5	80	5	40	80	40	5	20	80	10	40	20	5	40	80	40	80
127	2016	21	40	20	40	10		20	5		80	80	40		160	80	40	20	160	80	40	20	5	40	80	5	10	5	20	40		40	5	80	5	80	80	40	10	40	80	10	40	20	5	80	80	20	80
22	2013	0	5	5	20	40	160	20	40		5	80	160	20	40	10		80	10	80	80	40	5	320	40	5	40	5	80	40	40	80	5	5	5	80	10		10	80	80	20	160		80	80	160	320	40
22	2013	21	5	5	320	20	320	80	40		5	160	160	160	160	160		40	40	320	160	40	5	5	80	5	40	5	80	160	20	80	5	5	5	320	10		20	160	320	10	10		80	160	320	320	160
22	2014	0	5	10	40			20	80	20	5	160	160	20	80	20	160	80	80	160	80	80	5	5	160	10	40	10	80	40		80	5	5	5	160	10	80	40	160	320	10	320	160	80	320	80	320	80
22	2014	21	10	5	80			80	160	20	5	320	320	20	160	40	1280	160	80	320	80	80	10	5	20	10	160	10	640	80		40	20	10	10	320	20	640	320	320	2560	10	1280	1280	80	1280	160	1280	160
22	2015	0	5	5	40			40	40	20	5	160	160	160	80	20	80	80	20	160	40	40	5	5	80	160	10	5	80	80		40	5	5	5	160	10	40	20	80	160	5	160	160	80	80	320	640	80
22	2015	21	5	5	40			160	40	20	5	160	80	320	160	20	320	160	20	160	40	40	5	5	80	640	20	5	320	160		40	5	10	5	160	20	320	40	160	640	5	320	640	80	640	160	1280	160
22	2016	0	5	10	20	40		40	40	40	5	80	80		40	10	80	160	20	40	80	40	5	10	80	80	10	5	80	40		80	5	10	5	80	20	160	5	80	320	10	10	160	80	160	40	320	40
22	2016	21	10	20	80	40		80	80	40	5	80	80		80	40	160	80	20	80	80	20	5	20	80	80	20	5	160	80		80	5	20	5	80	40	320	5	80	640	5	20	160	40	320	40	320	40
86	2013	0	80	20	160			10				320			640	40		5	640	640	80	10		40		5	5	5	20	160				40		320	160	40	10	320	10	5	160			80	160	20	160
86	2013	21	160	20	160			20				320			640	80		5	320	640	80	5		80		10	5	5	40	160				80		320	160	80	10	640	40	5	320			160	160	40	160
86	2014	0	320	10	80			40	20		20	320	10	20	320	160	10	5	320	640	40	5	5	160	5	40	40	5	40	320		10	5	160	5	320	5	40	5	320	80	5	5	10	10	160	160	20	40
86	2014	21	80	10	320			80	20		20	320	10	40	640	320	80	5	320	1280	160	5	5	320	40	40	40	5	320	40		20	5	640	5	640	5	160	10	640	320	5	20	40	10	640	320	160	80
86	2015	0	80	20	160			40	5		10	320	10	20	320	80	40	5	640	160	40	5	5	20	5	5	5	5	80	320		5	5	80	5	320	80	40	5	320	80	5	20	10	10	40	160	20	80
86	2015	21	80	10	160			40	10		10	320	5	40	640	80	640	10	640	320	80	5	5	20	5	160	20	5	1280	640		10	5	40	5	160	80	5120	5	320	1280	5	320	160	10	1280	160	640	80
86	2016	0	80	20	160	20		40	20		20	640	10		1280	160	640	5	640	640	40	5	5	40	5	20	5	5	320	320		10	5	80	5	640	160	640	10	160	640	5	80	40	10	640	640	160	160
86	2016	21	80	20	160	20		80	20		20	640	10		1280	160	640	5	640	640	80	5	5	40	10	20	10	5	320	320		10	5	80	5	640	160	640	10	320	640	5	80	40	10	640	640	40	160
77	2013	0	5	5	20			20				20			40	5		10	80	80	80	20		5		20	10	5	10	10				5		20	20	20	10	40	10	5	10			40	10	20	20
77	2013	21	5	5	40			1280				40			80	10		10	80	160	80	10		5		20	10	5	20	20				10		40	20	40	10	80	160	5	10			40	20	40	80
77	2014	0	20	5	5			10	20		10	20	40	20	40	10	10	5	40	40	10	10	5	40	40	10	40	5	20	10		10	10	10	5	20	10	40	20	20	20	10	20	40	80	20	10	80	5
77	2014	21	10	5	20			80	40		20	40	160	80	80	40	40	5	80	160	40	80	320	40	80	20	160	10	160	80		40	40	160	40	80	20	40	40	80	160	20	80	320	80	80	40	320	20
77	2015	0	5	5	10			5	5		5	20	80	40	40	10	10	10	40	10	20	5	5	5	20	20	5	5	5	20		5	5	5	5	40	5	10	5	20	5	5	40	40	40	5	10	40	10
77	2015	21	5	5	40			20	10		5	40	80	40	80	20	80	10	80	20	40	5	20	5	40	80	20	5	40	40		20	10	10	10	80	10	80	20	40	80	5	80	160	40	40	20	80	20
77	2016	0	5	5	20	40		10	10		10	40	40		80	20	20	5	80	40	20	5	20	5	20	10	10	5	10	20		10	5	10	10	40	5	10	20	20	20	5	5	20	40	20	40	20	40
77	2016	21	20	5	80	80		160	40		40	160	160		640	160	320	10	320	160	80	10	5	20	160	20	20	10	40	40		80	20	80	40	160	80	20	10	40	80	10	40	40	160	80	160	40	80
73	2013	0	80	10	20			5				10			40	5		40	160	20	40	80		20		5	10	10	5	5				20		10	40	80	20	10	5	10	20			40	5	20	160
73	2013	21	80	20	20			40				20			40	10		80	80	40	40	80		40		40	20	20	40	10				40		20	80	160	20	40	40	20	40			160	20	80	80
73	2014	0	160	5	10			10	10		10	5	5	40	20	5	5	10	40	40	10	80	10	40	5	20	80	40	10	10		5	20	20	20	5	20	20	20	20	20	20	5	10	5	20	5	20	10
73	2014	21	160	5	20			80	10		10	10	10	40	20	10	40	20	40	40	20	80	20	80	5	40	80	20	80	10		10	20	40	20	10	20	160	20	20	80	20	5	40	5	320	10	40	20
73	2015	0	40	5	10			5	5		5	160	5	40	20	5	5	40	40	5	40	40	20	10	5	20	5	20	5	10		5	20	20	10	5	20	20	5	10	10	5	10	20	5	10	5	10	20
73	2015	21	40	10	40			40	5		10	10	10	40	40	160	40	80	80	10	40	80	20	20	5	40	20	40	80	20		5	20	20	20	10	20	320	5	20	160	20	40	40	5	160	5	160	40
73	2016	0	40	10	20	10		20	5		5	10	5		20	10	10	40	40	10	10	40	5	20	5	5	10	20	20	10		5	10	20	20	10	40	80	10	20	80	20	20	5	5	80	20	20	40
73	2016	21	40	5	20	5		20	5		10	10	5		40	20	40	40	80	10	20	40	10	20	5	5	5	20	20	5		5	10	20	10	10	40	40	10	20	80	10	20	10	5	40	20	10	40
28	2013	0	5	5	20	5	5	80	5		5	20	5	5	20	10		10	10	20	80	10	5	5	5	5	5	5	5	10	5	5	5	5	5	10	5		5	20	10	5	5		5	5	80	5	20
28	2013	21	5	5	20	5	5	80	5		5	20	5	5	20	10		10	10	20	40	5	5	5	5	5	5	5	5	10	5	10	5	5	5	20	5		5	40	10	5	5		5	5	40	10	20
28	2014	0	5	5	10			40	5	5	5	10	5	5	10	5	5	40	80	10	80	20	5	5	5	5	5	5	5	5		10	5	5	5	160	5	40	5	40	20	5	10	10	5	10	80	5	20
28	2014	21	5	5	40			40	5	10	5	40	5	5	40	10	10	40	40	80	80	20	5	5	10	5	5	5	5	10		10	80	5	5	160	5	20	5	80	40	5	20	5	5	20	80	10	40
28	2015	0	5	5	10			80	5	10	5	40	5	5	20	10	5	40	5	20	20	5	5	5	5	5	5	5	5	10		5	5	5	5	10	5	10	5	10	5	5	5	5	5	5	320	5	80
28	2015	21	5	5	40			80	5	20	5	80	5	20	80	40	80	40	20	80	80	20	5	5	20	40	5	5	80	80		20	10	5	5	40	5	160	5	40	160	5	40	40	5	160	160	160	160
28	2016	0	5	5	10	5		40	5	10	5	20	5		20	10	10	40	10	20	5	10	5	10	20	5	5	5	20	10		20	5	10	5	20	5	80	5	10	40	5	5	20	5	40	10	40	40
28	2016	21	10	5	20	5		80	5	10	5	40	5		80	20	40	40	10	20	40	10	5	10	20	10	5	5	40	20		40	5	10	5	20	10	80	5	40	80	5	10	20	5	80	10	40	40
88	2013	0	40	5	80			160				40			80	20		40	160	160	160	80		40		160	40	20	80	20				40		80	160	80	40	80	20	5	80			160	20	80	80
88	2013	21	160	10	80			160				80			160	40		80	80	320	160	80		80		160	40	40	80	40				80		80	160	160	40	160	40	10	320			160	40	160	80
88	2014	0	160	5	40			160	80		10	40	80	80	80	40	40	20	40	160	40	160	5	320	80	40	160	80	160	40		160	40	160	40	40	20	160	40	40	10	20	40	160	80	20	40	80	10
88	2014	21	80	5	80			160	160		20	80	80	80	80	80	160	20	80	320	80	160	40	160	160	40	80	80	160	80		80	80	160	80	80	40	320	80	160	40	40	40	320	80	80	80	320	20
88	2015	0	40	10	40			80	40		5	40	80	160	80	20	20	40	40	40	40	80	40	20	40	80	20	40	40	40		80	40	80	40	40	80	40	20	40	80	5	160	40	80	80	10	80	20
88	2015	21	40	5	80			80	40		5	80	40	80	80	20	40	20	80	40	40	80	40	20	40	160	40	40	80	80		80	40	40	80	40	80	160	20	40	160	5	160	160	40	80	20	160	20
88	2016	0	40	10	40	40		160	40		5	80	40		160	40	80	40	160	80	40	40	40	20	40	40	20	20	80	40		40	20	80	40	80	80	80	20	40	160	5	80	40	40	80	80	80	40
88	2016	21	40	10	40	40		160	40		5	160	40		320	80	80	40	160	320	80	40	40	20	40	40	20	20	40	80		40	20	80	40	160	80	80	20	40	160	10	80	40	40	160	320	40	80
118	2013	0	5	5	40			5				5			5	20		80	20	20	80	20		5		20	10	5	20	5				5		5	10	80	20	40	20	5	5			160	5	80	40
118	2013	21	10	5	40			5				5			10	20		80	20	20	160	20		5		40	10	5	80	5				5		5	20	320	20	20	80	5	5			160	5	160	40
118	2014	0	10	5	20			20	5		5	5	10	5	5	40	20	40	20	10	20	20	20	10	5	10	40	5	40	5		5	10	5	10	5	10	160	40	10	160	5	80	40	10	320	5	20	10
118	2014	21	20	5	40			5	10		10	5	10	10	5	80	20	40	20	40	80	20	20	20	5	10	40	5	80	10		5	20	40	10	5	10	80	40	20	160	5	160	40	10	160	5	40	20
118	2015	0	5	5	40			5	5		5	160	5	40	5	20	10	80	10	5	40	5	5	5	5	40	5	5	20	5		5	5	5	5	5	5	80	10	10	20	5	80	20	5	80	5	80	5
118	2015	21	5	5	80			5	5		5	20	5	40	10	10	80	160	20	5	40	5	5	5	5	80	5	5	80	10		5	5	5	5	20	5	320	10	20	160	5	160	80	5	160	5	160	40
118	2016	0	5	5	40	5		5	5		5	5	5		10	20	40	80	20	5	40	5	5	5	5	20	5	5	80	5		5	5	10	5	5	5	160	20	20	80	5	5	40	5	160	10	160	20
118	2016	21	5	5	40	5		10	5		5	20	5		40	80	80	80	40	40	40	5	10	5	5	20	10	5	80	5		5	5	10	10	20	10	160	20	20	160	5	5	40	5	160	40	40	40
91	2013	0	5	5	20			5				5			10	10		10	160	80	80	20		5		5	5	5	10	5				5		10	5	40	5	40	10	5	5			40	5	5	40
91	2013	21	5	5	20			10				20			20	10		10	80	80	40	20		5		10	5	5	20	10				5		20	5	80	5	40	20	5	5			80	10	10	40
91	2014	0	5	5	10			5	10		5	5	10	10	5	20	5	5	40	20	10	10	20	5	5	5	40	5	20	10		10	5	5	5	10	5	5	5	10	20	5	5	5	10	40	5	5	5
91	2014	21	5	5	10			10	10		5	5	10	5	10	20	80	5	80	40	10	10	5	5	5	5	20	5	40	10		20	5	5	5	10	5	80	5	20	80	5	5	20	10	80	5	10	5
91	2015	0	5	5	10			5	5		5	5	10	10	5	5	5	10	40	5	20	5	5	5	5	5	5	5	5	5		5	5	5	5	10	5	20	5	10	10	5	5	5	5	10	5	5	10
91	2015	21	5	5	20			10	5		5	10	10	5	20	5	10	5	80	10	20	5	5	5	5	5	5	5	40	20		10	5	5	5	640	5	40	5	20	80	5	20	5	10	80	5	40	20
91	2016	0	5	5	10	10		5	5		5	10	10		40	20	5	10	40	40	5	5	5	5	5	5	5	5	10	10		5	5	5	5	10	5	20	5	5	40	5	5	5	10	20	20	5	20
91	2016	21	5	5	40	10		40	5		5	40	10		40	40	160	10	80	40	20	5	5	5	10	20	10	5	160	20		10	5	5	5	20	5	160	5	10	320	5	5	40	5	320	40	40	40
102	2013	0	10	5	40	5	160	10	20		5	40	5	80	40	20		10	80	40	160	20	5	40	5	5	80	5	80	5	5	10	5	40	5	40	5	160	20	20	40	10	80		5	80	10	640	80
102	2013	21	10	5	40	5	320	40	5		10	40	10	80	40	20		10	80	160	160	20	10	40	10	5	320	5	160	5	5	20	5	20	5	40	10	160	40	80	160	20	5		10	160	10	640	80
102	2014	0	5	5	20			10	5		5	20	5	40	40	20	40	10	40	80	20	40	5	20	40	10	160	5	160	10		20	5	40	5	20	20	160	20	10	160	20	20	320	5	160	10	320	20
102	2014	21	10	5	160			40	5		10	20	10	80	40	160	320	5	40	80	80	80	40	20	80	10	320	5	640	40		40	10	20	5	40	40	320	40	40	160	40	80	1280	20	160	20	1280	40
102	2015	0	5	5	40			10	5		5	10	5	20	40	40	40	10	40	20	40	10	5	5	5	80	5	5	40	10		5	5	10	5	20	5	160	5	20	80	5	80	160	5	80	5	160	40
102	2015	21	10	5	80			40	5		5	40	5	80	40	40	160	20	40	20	40	20	5	5	20	320	20	20	320	40		20	5	20	5	80	5	320	20	20	320	5	320	320	5	320	10	640	40
102	2016	0	10	5	40	10		20	10		5	20	5		40	40	80	20	40	20	40	20	5	10	20	40	80	10	80	20		20	5	40	5	40	10	80	20	20	160	10	5	160	5	320	20	160	40
102	2016	21	10	10	80	10		40	10		5	160	5		160	160	160	20	160	160	40	20	5	10	20	80	20	10	160	80		20	5	40	5	160	5	160	20	40	320	10	5	320	5	160	160	320	80
97	2013	0	5	5	10	20	10	10	5		5	5	40	20	5	5		20	10	40	80	10	20	20	5	5	20	5	5	5	5	10	10	20	10	5	5	40	10	40	10	5	10		40	10	5	80	40
97	2013	21	5	5	20	20	10	10	5		10	20	40	10	10	5		20	10	40	80	10	20	10	10	5	40	5	10	5	5	10	10	5	10	20	5	40	10	40	10	5	5		40	10	5	40	40
97	2014	0	5	5	10			10	10		10	5	40	20	5	5	20	20	10	20	10	20	5	10	20	10	80	40	20	10		20	10	5	10	5	5	40	10	10	10	5	10	80	40	40	5	40	10
97	2014	21	5	5	10			80	40		10	80	80	20	20	10		20	10	160	10	20	20	80	160	10	40	40	80	10		40	20	5	10	80	5		20	40	40	5	80	20	80	40	5	320	10
97	2015	0	5	5	10			10	5		5	5	40	40	5	5	5	40	10	5	10	10	10	5	20	40	5	20	10	5		10	10	5	5	5	5	20	5	10	20	5	40	20	40	40	5	80	5
97	2015	21	5	5	10			10	5		10	10	40	40	20	5	5	40	10	5	10	20	5	5	20	40	5	40	20	20		10	5	5	10	80	5	40	5	10	80	5	40	20	40	80	5	160	20
97	2016	0	5	5	10	40		10	10		5	10	40		10	10	10	20	10	10	10	10	5	5	20	10	5	20	10	5		10	5	5	10	10	5	20	5	20	40	5	5	10	40	20	10	20	20
97	2016	21	5	5	40	40		20	20		10	10	40		10	10	20	40	20	10	20	10	5	5	20	10	5	20	20	10		10	5	10	10	10	10	20	10	20	80	5	5	20	40	40	10	20	40
36	2013	0	10	20	40	20	80	10	10		20	160	10	40	160	40		80	160	320	160	80	320	320	5	5	320	40	40	160	5	5	40	20	10	320	5		160	320	40	40	160		10	80	320	320	160
36	2013	21	10	10	160	10	40	10	10		10	320	20	320	320	80		80	160	640	160	160	40	10	5	10	320	80	20	320	5	5	20	5	20	320	5		80	320	80	20	5		20	40	640	160	160
36	2014	0	20	10	80			5	40	160	20	320	20	40	160	80	160	160	160	320	160	80	80	5	5	10	160	80	20	160		5	40	10	40	320	10	320	320	640	160	20	640	20	20	80	320	160	160
36	2014	21	20	10	160			10	40	320	20	640	20	80	640	160	40	160	320	640	320	160	160	10	5	20	320	80	40	320		5	80	10	40	320	10	80	640	1280	160	40	640	20	20	160	640	320	320
36	2015	0	10	10	160			10	10	320	5	320	10	160	320	160	20	80	160	320	160	40	40	10	5	160	80	40	20	640		5	20	10	20	320	10	40	80	320	40	10	160	20	10	40	640	160	320
36	2015	21	10	10	160			40	10	320	20	320	10	640	320	160	40	320	160	640	160	80	80	5	5	320	160	5	80	640		5	80	10	40	320	10	160	160	320	160	40	160	40	10	160	640	320	320
36	2016	0	20	20	80	20		20	10	320	20	160	20		160	40	20	80	80	160	80	40	160	20	5	80	80	40	20	320		20	20	10	20	160	10	160	20	320	40	20	5	20	20	80	160	160	80
36	2016	21	20	20	320	40		80	20	640	20	640	20		640	160	320	80	160	640	320	80	160	20	10	80	160	40	160	640		20	40	20	40	640	10	320	20	1280	160	20	5	80	20	320	640	320	320
9	2013	0	5	20	160	40	80	320	10		10	80	40	10	20	160		20	320	160	160	5	80	80	5	10	80	10	40	80	5	5	5	10	5	80	5		40	160	40	5	80		5	20	160	160	20
9	2013	21	5	20	320	40	160	320	20		10	320	40	80	80	320		10	640	320	320	5	80	10	10	20	80	10	80	160	5	10	5	5	5	320	5		80	160	160	5	5		80	80	320	320	80
9	2014	0	5	20	160			160	20	160	10	160	160	20	20	160	80	20	640	160	160	20	80	10	5	20	80	10	40	40		5	5	5	5	160	10	80	80	160	80	5	160	40	80	80	160	160	20
9	2014	21	5	20	160			160	10	160	40	160	160	20	40	160	40	20	640	160	320	10	80	10	10	20	80	10	80	40		5	5	10	5	160	20	80	40	320	320	5	80	40	80	160	160	160	40
9	2015	0	5	20	160			320	5	80	10	160	40	80	40	160	40	20	160	320	160	5	10	5	5	40	40	5	40	160		5	5	5	5	160	5	20	20	160	40	5	40	40	80	20	320	80	80
9	2015	21	5	10	320			320	5	160	20	320	40	80	320	160	320	10	320	640	320	5	20	10	20	80	20	5	320	320		5	5	5	5	320	5	640	20	320	320	5	160	160	40	320	320	640	160
9	2016	0	5	20	160	80		320	10	160	10	160	40		80	80	80	10	160	160	160	5	20	20	10	20	20	10	80	320		20	5	10	5	80	10	160	10	80	160	5	5	80	80	80	80	160	20
9	2016	21	5	20	160	80		320	10	160	20	160	40		160	160	640	20	160	160	160	10	40	20	20	160	40	10	640	320		20	5	10	5	160	5	1280	10	160	640	5	5	320	80	640	160	640	40
94	2013	0	10	5	10			40				20			20	10		10	10	40	160	40		5		20	5	5	20	10				10		20	40	40	20	40	20	10	10			80	5	40	20
94	2013	21	20	10	20			80				20			20	10		20	20	40	80	40		10		10	5	10	20	10				10		40	40	80	20	40	40	20	20			80	10	20	40
94	2014	0			10							10			10	10			10	40	10									20						20				20							10		5
94	2014	21			10							20			20	10			10	80	20									20						20				40							10		10
94	2015	0	10	5	10			40	10		40	20	40	5	20	5	40	10	20	10	20	20	5	5	5	5	5	10	5	20		20	5	10	5	20	5	40	5	20	40	10	10	40	40	20	10	5	10
94	2015	21	10	5	20			160	20		40	40	40	10	40	10	20	10	40	20	40	40	5	10	20	20	5	20	40	80		20	5	20	5	40	10	40	5	40	80	20	40	20	40	80	20	80	20
94	2016	0	5	5	10	40		80	20		10	20	40		40	40	20	5	20	40	20	20	20	5	10	5	5	10	10	20		20	5	20	5	40	5	40	10	20	80	10	5	20	40	80	40	10	20
94	2016	21	10	10	20	40		80	20		5	40	40		40	40	80	20	40	40	40	20	10	10	20	5	5	10	20	20		20	5	20	5	40	20	40	10	20	80	10	10	40	40	40	40	40	40
89	2013	0	10	5	40			20				20			10	20		20	80	40	40	20		5		80	10	10	80	10				5		20	40	80	10	40	160	5	20			160	10	320	40
89	2013	21	10	10	40			40				40			40	20		40	80	160	80	10		10		160	10	10	160	40				20		40	40	80	20	80	160	5	40			320	20	320	80
89	2014	0	5	5	40			40	20		5	20	20	80	10	40	10	10	40	40	40	10	10	10	5	5	40	20	320	40		20	20	10	20	20	10	20	10	40	40	10	5	160	20	80	20	320	10
89	2014	21	10	5	80			40	40		10	40	40	80	40	80	160	10	40	80	80	40	10	10	20	5	80	20	320	80		20	40	80	80	40	20	160	10	80	80	20	5	640	20	160	40	1280	20
89	2015	0	5	5	80			20	5		5	20	10	160	20	20	40	10	40	10	40	5	20	5	20	160	5	10	160	20		5	10	10	5	40	20	80	5	20	320	5	320	640	10	160	10	640	20
89	2015	21	5	5	80			40	5		5	40	10	320	20	20	40	10	40	20	80	10	20	5	20	640	20	10	320	40		10	20	10	20	20	20	320	20	40	640	5	640	640	10	640	20	2560	40
89	2016	0	5	5	40	10		40	10		5	80	20		160	160	160	40	80	160	40	5	10	5	20	80	10	10	160	40		10	10	10	20	80	40	320	10	20	640	5	40	320	10	320	80	640	40
89	2016	21	20	10	160	20		80	20		10	80	20		80	80	320	40	160	80	160	10	10	20	40	160	20	20	160	80		20	20	40	40	80	80	160	20	80	640	10	40	640	20	640	80	640	80
29	2013	0	40	5	80	40	20	40	80		320	20	80	20	20	80		20	160	20	160	160	80	40	20	5	20	20	10	10	160	80	10	80	20	10	160		10	40	10	80	20		40	10	80	40	320
29	2013	21	40	5	80	40	40	40	40		160	20	80	20	20	80		20	160	80	160	80	40	5	20	10	10	10	10	20	160	80	5	40	10	20	160		10	40	20	80	80		40	20	80	40	320
29	2014	0	160	5	40			40	40	320	320	10	160	5	20	40	40	40	160	10	160	320	80	5	40	10	10	40	5	5		80	10	40	20	160	160	40	20	40	80	40	80	40	40	40	80	40	320
29	2014	21	80	5	80			40	80	320	160	20	80	5	20	40	40	20	160	20	160	160	80	5	80	10	10	20	10	10		40	10	40	20	160	160	40	10	40	40	20	160	20	80	40	80	80	320
29	2015	0	40	5	40			80	40	320	160	40	80	160	20	40	80	40	80	20	80	160	20	5	80	160	5	20	40	20		80	20	40	20	20	320	80	5	10	160	40	160	160	40	160	320	320	320
29	2015	21	40	5	80			40	40	320	160	40	80	320	40	80	320	40	40	40	80	160	20	5	80	320	10	20	640	40		80	10	40	10	20	160	320	10	20	640	20	640	320	40	640	160	1280	320
29	2016	0	40	5	40	40		40	40	320	160	10	80		20	20	160	40	40	10	80	160	40	40	80	160	5	40	160	10		80	10	40	10	10	320	640	5	20	320	40	320	320	40	320	5	320	160
29	2016	21	40	10	160	40		80	80	640	80	40	80		80	80	320	40	160	20	320	160	80	80	80	80	10	20	160	40		160	20	40	10	20	320	320	5	40	640	40	320	320	40	640	20	320	160
131	2013	0	5	5	80			40				40			40	5		40	40	160	80	5		5		160	5	5	5	40				5		40	5	80	80	160	10	5	5			160	40	160	80
131	2013	21	5	5	80			40				40			40	5		80	80	160	80	5		5		160	40	5	160	40				5		40	5	160	80	160	160	5	5			320	40	320	80
131	2014	0	10	5	20			20	5		5	20	5	80	20	10	20	5	40	160	40	5	5	5	5	5	320	10	80	40		40	5	5	10	20	5	80	80	80	80	5	40	160	5	40	40	640	10
131	2014	21	5	5	80			40	5		5	40	5	80	40	80	40	5	80	160	80	5	40	40	80	5	640	10	80	80		40	5	5	5	80	5	40	40	160	80	5	40	160	5	40	80	160	40
131	2015	0	5	5	40			20	5		5	20	5	80	20	20	20	80	40	20	40	5	5	5	10	160	5	5	5	40		10	5	5	5	10	5	80	40	40	40	5	160	80	5	40	20	160	20
131	2015	21	5	5	160			160	5		5	80	5	320	160	80	320	80	80	80	160	5	5	5	40	640	80	5	320	320		40	5	5	5	80	5	640	80	320	320	5	640	640	5	320	80	1280	40
131	2016	0	5	5	40	5		40	5		5	40	5		80	40	40	5	80	40	40	5	5	5	20	20	20	5	40	40		10	5	5	5	40	5	40	40	40	80	5	5	80	5	80	80	80	40
131	2016	21	5	5	40	5		40	5		5	80	5		80	80	80	40	80	80	40	5	5	5	5	40	20	5	40	80		5	5	10	5	80	5	80	40	40	80	5	5	80	5	80	160	80	80
90	2013	0	10	10	40			40				10			5	10		20	20	80	40	20		10		10	5	10	10	5				40		5	80	40	5	40	5	5	40			40	5	20	40
90	2013	21	10	10	40			80				20			20	20		20	20	160	80	5		20		20	5	10	20	20				40		10	80	40	5	160	20	5	80			80	20	40	80
90	2015	0	10	10	40			80	20		5	10	40	10	5	10	5	20	10	10	40	5	5	5	40	5	5	10	5	10		20	5	80	5	10	40	10	5	10	10	5	20	10	20	10	5	20	10
90	2015	21	20	10	80			80	20		5	40	40	20	40	10	10	20	40	40	40	20	5	5	40	40	5	20	40	40		40	5	40	5	80	80	40	5	40	80	5	80	40	40	80	20	160	20
90	2016	0	10	10	20	20		40	20		5	20	40		40	20	10	20	20	40	10	10	5	5	20	5	5	5	10	10		10	5	40	5	10	80	10	5	10	20	5	40	10	20	20	20	10	20
90	2016	21	10	10	40	20		80	20		5	40	40		40	20	20	20	40	80	20	10	5	10	40	5	5	10	20	40		10	5	80	5	40	80	20	5	40	40	5	80	10	40	40	40	10	40
112	2013	0	5	5	160			20				160			320	80		80	320	320	160	40		5		80	40	40	80	80				5		320	10	80	40	160	80	5	5			160	160	160	80
112	2013	21	20	10	320			160				320			320	160		80	640	640	320	40		5		640	160	40	320	160				20		320	40	640	160	320	640	10	10			640	160	640	160
112	2014	0	5	5	80			40	40		5	160	40	80	10	80	20	40	160	320	80	40	5	5	10	5	320	40	80	160		10	5	5	10	160	10	160	40	160	320	10	20	160	40	320	160	640	20
112	2014	21	5	5	320			80	80		5	160	80	160	320	160	80	40	160	320	160	40	20	5	160	5	640	80	640	160		160	20	20	40	320	20	320	80	320	1280	20	80	640	80	640	160	640	40
112	2015	0	5	5	160			40	10		5	160	40	80	160	40	20	80	160	80	80	10	5	5	10	80	20	40	40	80		5	5	5	5	160	5	80	20	80	80	5	160	80	40	40	40	160	40
112	2015	21	5	5	320			80	20		5	160	40	320	320	80	160	80	160	160	160	20	5	5	40	640	160	40	320	160		10	5	10	5	320	5	320	80	160	640	5	640	160	40	320	80	640	80
125	2013	0	80	10	80			10				10			20	40		80	40	20	80	40		80		40	20	10	40	5				160		10	320	40	20	40	10	5	320			80	5	80	40
125	2013	21	40	5	80			10				40			20	40		40	20	80	80	40		40		80	20	5	40	20				80		20	320	80	40	80	10	5	160			160	20	80	80
125	2014	0	80	5	40			10	5		10	20	5	20	10	40	20	20	10	80	40	10	5	80	5	40	80	10	20	20		10	10	160	10	20	5	40	20	40	80	5	5	40	5	80	20	40	20
125	2014	21	80	5	40			20	10		10	20	5	40	10	40	10	20	10	80	80	20	40	320	5	40	80	10	40	40		5	20	160	20	20	10	20	10	80	160	10	5	20	5	80	20	40	20
125	2016	0	40	5	80	5		10	5		5	40	5		40	80	20	40	40	80	40	10	10	20	5	5	10	10	20	80		5	10	160	20	40	160	20	20	40	80	5	80	10	5	40	80	20	160
125	2016	21	40	5	80	5		40	5		5	320	5		160	160	160	40	80	320	40	10	10	20	10	20	40	5	40	160		5	10	80	20	160	160	40	20	80	160	5	80	10	5	160	320	10	160
126	2013	0	80	40	20			20				40			80	20		80	160	80	80	20		160		40	20	20	20	10				160		40	320	80	20	40	20	5	160			80	10	20	80
126	2013	21	40	40	40			40				80			80	20		40	160	160	80	20		80		40	10	10	20	20				160		80	160	80	20	80	80	5	160			80	20	20	80
126	2014	0	80	20	10			80	40		10	40	40	20	40	20	10	10	40	80	20	10	5	320	20	80	80	40	5	10		20	10	320	10	40	5	40	10	20	160	5	10	20	40	160	10	10	20
126	2014	21	80	20	20			80	40		10	40	40	20	80	20	20	10	40	160	20	10	160	160	20	80	80	40	20	20		20	20	640	20	40	5	40	10	40	160	5	20	40	40	320	20	20	20
126	2016	0	40	20	20	20		80	20		5	80	20		160	40	5	20	80	80	20	5	10	40	5	5	5	20	5	10		10	5	160	10	80	80	20	5	10	20	5	40	5	20	10	40	5	80
126	2016	21	20	20	160	20		80	20		5	160	20		320	320	40	40	640	160	160	5	20	40	10	5	10	10	20	160		20	10	80	10	160	80	40	20	80	80	5	80	10	20	40	320	10	160
79	2013	0	5	80	80			80				80			80	10		160	80	160	80	5		40		40	5	20	40	80				80		160	5	40	5	320	40	5	5			160	80	160	320
79	2013	21	5	40	80			160				160			160	20		80	80	320	80	5		20		160	5	10	320	160				40		160	5	80	5	320	80	5	5			640	160	320	320
79	2014	0	5	80	40			80	160		5	80	40	20	40	20	20	40	20	160	20	20	5	80	5	40	10	20	160	160		80	5	80	5	80	10	40	5	160	80	10	10	160	40	80	160	160	80
79	2014	21	5	20	160			160	80		10	80	40	40	80	40	80	40	40	320	80	40	5	160	5	40	20	20	160	160		40	10	80	20	160	20	160	5	320	40	20	20	320	40	160	160	320	80
79	2015	0	5	20	80			80	20		5	40	40	20	80	10	10	80	40	80	40	5	5	5	40	40	5	20	40	160		40	5	40	5	80	5	20	5	160	80	5	40	80	40	40	80	160	160
79	2015	21	5	80	320			320	40		5	160	80	80	160	80	80	80	160	160	320	80	40	80	320	320	5	80	320	640		80	80	160	40	160	5	320	5	320	320	20	320	160	80	320	160	640	320
111	2013	0	40	20	160			40				80			160	40		320	160	160	160	40		20		80	5	80	40	40				20		80	5	160	40	160	10	10	80			80	40	80	80
111	2013	21	20	10	160			40				80			160	80		160	160	320	160	40		20		80	20	80	40	80				10		160	5	160	40	320	20	10	40			160	80	80	160
111	2014	0	20	10	80			20	10		5	80	10	80	80	80	20	160	80	160	80	40	5	40	5	20	160	160	20	80		20	20	5	20	80	10	80	40	80	320	10	20	80	20	640	80	160	40
111	2014	21	40	5	160			80	20		5	160	20	160	160	160	20	80	160	320	160	40	80	40	80	40	320	160	80	160		40	40	5	20	160	20	160	80	320	320	20	40	320	20	320	160	320	80
111	2015	0	10	10	160			40	5		5	160	5	40	160	80	20	160	80	80	80	20	20	10	5	80	20	160	20	80		5	20	5	20	80	20	80	20	80	40	5	80	80	10	40	40	80	80
111	2015	21	10	5	160			80	5		5	160	10	80	160	80	80	160	160	80	160	20	20	10	5	80	40	160	80	160		20	20	10	20	160	20	160	40	160	160	5	160	160	10	160	80	160	80
71	2013	0	20	10	160	5	10	160	10		5	40	10	20	80	10		160	80	160	40	80	80	160	20	10	40	5	40	20	5	5	40	160	40	80	160	80	20	80	80	20	160		10	40	20	320	80
71	2013	21	160	20	160	10	5	20	5		10	40	20	40	20	10		160	80	160	80	80	40	80	20	20	80	10	20	20	5	20	80	80	80	160	320	160	20	160	40	40	160		10	40	20	160	160
71	2015	0	80	20	160			80	5		5	80	5	20	160	20	20	160	80	80	40	80	40	40	20	80	5	20	20	80		20	40	160	40	80	160	320	10	80	40	20	160	20	5	40	40	160	160
71	2015	21	80	40	320			160	5		10	160	20	40	320	20	20	160	320	160	160	80	40	40	40	160	5	40	80	320		40	40	80	40	320	160	320	20	320	80	20	320	80	10	80	160	320	160
71	2016	0	160	40	320	5		160	10		10	80	10		160	20	20	160	160	160	40	40	20	40	20	80	5	20	40	160		40	20	160	40	160	320	160	20	80	160	20	320	5	5	80	160	160	160
71	2016	21	160	20	160	5		160	10		10	160	10		640	40	20	160	320	320	40	40	20	40	20	40	5	10	40	160		40	20	160	40	320	320	160	10	80	160	10	160	5	10	80	320	5	160
80	2013	0	80	10	20	10	80	20	10		160	20	10	80	40	10		10	40	80	80	5	20	160	10	20	160	5	80	10	40	20	40	80	160	20	10	40	80	40	40	5	40		20	40	10	160	80
80	2013	21	80	20	40	10	160	40	10		160	40	20	80	80	20		10	40	160	40	5	80	80	20	20	640	5	80	40	40	40	40	5	10	40	10	40	80	80	40	5	20		20	40	40	160	80
80	2015	0	80	10	40			40	5		80	20	10	160	80	20	80	10	40	40	40	5	40	20	5	320	80	10	160	40		10	40	40	40	40	10	320	80	40	320	5	320	320	10	320	20	640	80
80	2015	21	80	20	80			80	10		80	80	20	320	160	20	320	20	80	40	40	5	80	40	20	640	5	10	320	80		40	40	40	40	80	20	640	80	80	640	5	1280	640	10	320	40	640	80
80	2016	0	80	20	40	20		40	20		80	40	20		80	40	160	20	40	40	40	5	40	40	20	80	40	10	320	40		40	20	80	40	40	40	320	80	40	640	5	20	320	10	640	80	320	80
80	2016	21	80	20	80	40		320	20		80	320	20		640	160	640	20	160	320	80	10	80	80	80	320	160	20	320	160		80	40	160	80	320	40	640	80	80	640	20	40	640	40	640	320	640	320
106	2013	0	80	160	80	10	40	10	160		80	20	10	160	20	20		40	80	40	80	5	10	320	5	40	80	5	20	10	5	5	5	320	5	20	5	80	20	80	10	5	40		10	10	10	160	40
106	2013	21	160	160	160	10	80	20	10		80	40	20	80	80	20		40	80	80	80	5	10	160	5	40	320	5	40	10	5	5	5	160	5	40	5	80	20	80	40	5	10		20	40	20	160	40
106	2014	0	320	5	80			10	20		40	20	10	80	20	20	20	40	40	40	40	10	5	640	5	320	160	10	40	20		5	5	320	10	20	5	40	20	40	40	5	5	160	20	160	20	160	10
106	2014	21	160	80	640			40	40		40	80	20	160	80	80	20	20	160	160	160	20	20	640	5	160	320	20	160	80		5	20	80	40	80	20	160	20	160	160	20	10	320	40	80	40	320	40
106	2016	0	160	160	160	20		10	20		40	40	40		80	40	20	40	80	20	40	5	10	80	10	20	10	5	40	80		5	5	160	5	80	10	80	20	40	160	5	20	80	20	80	40	80	40
106	2016	21	320	160	160	20		20	20		40	160	40		160	80	80	40	160	80	80	5	10	80	10	20	10	5	80	80		10	5	160	5	80	10	80	20	40	160	5	20	80	20	80	160	80	80
108	2013	0	40	40	40	5	40	5	40		40	40	10	40	80	20		10	40	80	160	20	10	80	5	10	20	5	10	20	40	5	5	80	5	80	5	80	10	80	10	5	20		5	10	20	80	320
108	2013	21	40	40	80	5	80	20	5		40	80	20	80	160	40		10	80	320	80	20	10	80	5	20	320	5	80	80	40	5	10	40	10	160	10	80	10	320	40	20	5		10	40	80	160	640
108	2015	0	20	20	40			20	5		5	40	5	20	40	20	20	10	5	20	40	10	5	20	5	80	5	5	80	40		5	5	40	5	20	5	80	5	80	80	5	160	80	5	80	20	80	80
108	2015	21	40	80	160			80	5		20	320	20	80	320	40	160	40	80	160	320	40	20	40	80	160	40	5	160	640		5	20	80	20	320	5	320	40	640	640	20	640	320	5	320	320	320	320
108	2016	0	40	40	80	5		40	5		20	40	5		80	40	80	5	20	40	40	20	5	40	5	20	10	5	80	80		5	5	80	5	80	5	80	10	80	160	5	5	80	5	160	80	80	160
108	2016	21	40	40	160	5		80	5		20	320	5		320	160	160	10	80	160	160	10	5	40	40	40	20	5	160	320		5	5	80	10	320	5	160	20	160	160	5	5	80	5	160	320	80	320
68	2013	0	5	5	40	40	40	10	40		20	20	40	80	20	40		10	40	40	80	10	40	80	5	5	80	5	10	10	5	5	10	80	5	20	20	40	40	80	5	5	20		40	40	10	160	40
68	2013	21	10	5	80	40	320	80	40		40	40	40	160	80	40		10	80	160	160	10	160	40	5	5	640	5	160	40	5	5	40	40	20	40	40	320	80	160	320	20	40		40	320	40	1280	160
68	2014	0	40	5	20			40	160		40	20	20	80	20	40	20	5	20	80	40	20	40	80	5	10	320	10	80	40		5	20	80	20	20	10	80	40	40	20	10	5	80	80	20	20	320	10
68	2014	21	40	5	80			40	80		40	20	20	80	40	160	40	5	40	80	160	20	160	80	5	10	160	10	80	40		5	20	80	20	40	5	80	40	80	80	5	5	160	80	80	40	320	20
68	2016	0	10	5	40	40		20	40		40	40	5		80	160	20	10	80	40	80	10	5	5	5	20	20	5	20	20		5	10	40	10	40	40	40	20	40	80	5	10	20	5	80	80	80	40
68	2016	21	10	5	80	40		80	40		40	80	5		160	160	80	10	80	160	80	10	40	5	5	40	40	5	40	40		5	10	40	10	80	80	80	20	40	160	5	20	40	5	160	160	40	40
81	2013	0	10	10	20	10	80	20	40		5	5	20	20	10	10		80	40	40	80	5	10	40	5	5	20	5	20	10	5	20	5	40	5	10	10	40	10	40	40	5	20		20	40	5	160	40
81	2013	21	20	10	80	20	160	80	20		5	80	40	40	160	20		80	160	320	160	10	20	40	10	10	160	5	160	40	5	20	5	40	10	160	40	80	20	160	160	10	40		20	160	40	320	80
81	2014	0	40	5	20			40	20		5	10	20	20	20	20	10	40	40	160	20	10	5	80	10	20	40	10	80	20		20	5	160	10	20	5	80	10	40	160	5	10	160	20	160	10	160	10
81	2014	21	80	5	80			20	20		5	40	20	40	40	80	80	40	80	160	80	10	40	160	20	20	80	10	160	80		20	10	80	20	40	10	160	20	40	320	10	10	640	20	1280	20	640	20
81	2015	0	20	10	20			20	5		5	10	20	20	20	10	20	80	40	10	40	5	5	10	20	80	5	5	40	10		10	5	40	5	10	20	20	5	10	80	5	80	80	10	80	5	320	10
81	2015	21	20	20	160			80	10		5	40	20	1280	80	40	1280	80	80	40	160	20	40	20	40	5120	80	10	5120	80		20	40	40	40	160	40	5120	160	80	5120	5	5120	5120	40	5120	20	20480	40
98	2013	0			20							20			20	20			40	80	160									10						20				20							5		10
98	2013	21			80							160			80	40			40	320	160									160						160				320							160		80
98	2014	0	5	5	20			5	10		5	20	5	80	20	20	5	5	20	80	20	20	5	5	5	5	160	5	20	40		5	5	5	5	20	10	10	10	40	10	10	5	20	5	10	20	40	10
98	2014	21	5	5	80			40	10		5	80	5	80	40	80	80	5	20	160	80	40	5	5	5	5	160	5	80	80		5	10	5	10	40	10	10	40	80	20	10	5	80	5	20	40	160	10
98	2015	0	5	5	40			5	5		5	20	5	80	20	10	20	5	10	10	20	20	5	5	5	40	5	5	10	20		5	5	5	5	20	5	20	5	20	40	5	80	40	5	20	10	80	20
98	2015	21	5	5	160			20	5		5	80	5	160	80	40	40	5	20	40	80	20	5	5	5	160	40	5	80	160		5	10	5	5	80	5	160	40	80	160	5	160	160	5	160	40	320	20
107	2013	0	10	10	160	20	40	40	10		5	320	20	160	640	80		5	1280	640	160	5	40	20	5	5	320	5	40	160	40	40	5	20	5	640	5	160	80	640	20	5	40		20	40	160	320	80
107	2013	21	10	5	160	10	80	40	10		10	320	40	160	640	80		5	640	640	160	5	20	20	10	5	1280	5	40	80	40	20	5	10	5	320	5	80	80	320	40	5	10		20	40	80	160	80
107	2014	0	10	80	80			20	20		5	160	20	80	320	80	20	5	320	320	80	10	5	20	10	10	320	5	20	160		40	10	20	10	320	5	80	40	320	40	5	10	80	20	20	160	160	10
107	2014	21	10	5	160			80	20		10	320	20	160	320	160	40	5	320	640	160	10	80	40	40	20	640	5	80	320		20	10	20	20	320	10	320	40	320	80	10	20	320	20	80	160	160	20
107	2015	0	10	5	160			20	10		5	320	20	80	320	80	20	5	320	160	160	5	5	5	20	80	40	5	20	160		20	5	20	5	320	5	40	40	320	40	5	80	40	10	40	80	80	20
107	2015	21	10	5	160			80	10		10	320	20	160	320	160	160	10	640	160	160	5	20	5	40	320	80	5	80	320		40	20	10	10	320	5	160	80	320	160	5	320	320	20	160	80	320	40
107	2016	0	10	10	80	20		20	20		10	160	20		320	80	20	5	320	80	80	5	20	10	20	20	40	5	20	160		20	5	20	10	320	5	40	40	160	80	5	10	40	10	80	160	80	40
107	2016	21	20	20	160	20		160	20		10	640	40		1280	320	80	5	1280	320	160	5	20	20	40	40	40	5	80	320		40	10	40	10	640	10	80	80	160	160	5	20	80	20	160	320	80	80
14	2013	0	20	5	20	5	80	40	5		80	320	5	20	160	10		5	160	160	40	20	5	80	5	5	10	5	40	80	10	10	5	5	5	160	5		5	160	40	5	40		5	20	160	320	160
14	2013	21	20	5	80	10	160	40	10		40	320	10	40	320	80		5	160	160	160	20	5	5	5	10	10	5	40	160	20	20	5	5	5	160	5		5	160	80	5	5		20	40	160	160	160
14	2014	0	20	5	40			10	5	20	40	80	5	40	80	20	40	5	160	80	80	40	5	10	5	10	5	5	20	20		5	5	5	5	160	5	80	5	80	320	5	80	40	5	320	80	80	80
14	2014	21	40	10	80			80	80	40	80	160	80	40	160	80	40	20	160	160	160	80	5	20	40	10	20	5	80	40		20	80	10	80	160	20	80	10	160	640	20	320	80	20	640	80	160	160
14	2015	0	20	5	80			40	5	40	80	320	5	20	320	40	10	5	160	320	80	20	5	5	5	40	5	5	40	320		5	5	5	5	320	5	20	5	80	40	5	40	40	5	40	640	160	320
14	2015	21	20	5	80			80	5	80	80	320	20	40	320	80	40	20	160	320	160	40	5	10	20	160	5	5	160	320		10	20	20	20	320	5	160	5	160	320	5	80	160	10	160	160	640	160
54	2013	0	5	5	5	10	5	5	10		10	10	10	20	10	10		5	20	5	40	5	5	5	5	5	10	5	5	10	5	5	5	5	5	10	5		5	20	5	5	5		5	5	80	5	10
54	2013	21	5	5	160	10	10	40	10		5	80	10	20	160	160		5	160	80	160	5	5	5	20	5	10	5	10	40	5	20	5	5	5	160	5		5	80	40	5	5		10	10	160	10	80
54	2014	0	5	5	40			10	10	20	5	40	10	5	80	20	20	10	160	40	80	5	5	5	40	5	10	5	5	5		5	5	5	5	160	5	40	10	20	5	5	10	5	5	5	40	5	20
54	2014	21	5	5	160			20	20	80	10	160	10	20	320	80	80	10	320	320	160	20	5	5	40	5	20	10	20	40		10	10	5	20	160	5	80	20	160	80	5	40	10	20	80	80	20	40
54	2015	0	5	5	80			20	5	40	10	80	10	20	160	80	10	5	160	80	40	5	5	5	5	5	5	5	10	40		5	5	5	5	80	5	5	5	20	10	20	5	5	5	10	320	5	80
54	2015	21	5	5	160			40	20	80	10	160	10	40	320	160	80	5	320	160	160	20	20	20	40	40	10	5	160	160		5	20	10	10	160	5	160	5	80	160	20	40	20	10	160	160	80	80
93	2013	0	20	5	20	10	5	5	5		20	20	5	10	40	10		10	40	40	80	5	10	40	5	5	10	5	10	10	5	5	5	10	10	20	10	40	10	40	10	5	5		5	5	10	20	20
93	2013	21	20	5	20	10	5	5	5		20	20	10	10	40	10		10	40	160	40	10	10	20	5	5	40	5	10	20	5	5	5	5	10	20	10	80	10	80	10	5	10		5	10	20	40	20
93	2014	0	40	5	10			5	10		20	10	5	10	40	20	10	5	20	40	10	10	5	20	5	20	20	5	10	20		5	5	5	5	20	5	40	10	20	40	5	5	40	5	40	10	40	5
93	2014	21	40	5	40			5	10		20	20	5	10	40	40	20	5	40	160	40	20	5	20	5	20	20	5	20	40		5	5	5	5	40	5	80	5	80	80	5	5	40	5	40	40	20	10
93	2015	0	20	5	40			5	5		10	160	5	10	20	10	20	10	40	5	20	5	5	5	5	20	5	5	40	10		5	5	5	5	10	10	80	5	10	80	5	40	40	5	40	5	80	10
93	2015	21	20	5	80			40	5		20	160	5	20	320	20	640	40	160	160	80	10	5	10	5	320	20	5	2560	320		20	5	10	5	160	20	1280	5	320	2560	5	640	160	5	2560	80	2560	80
114	2013	0			40							80			40	20			20	160	160									80						80				160							40		80
114	2013	21			40							80			40	20			40	160	80									80						80				160							40		80
114	2015	0	5	40	40			40	40		40	40	5	40	20	10	10	20	10	40	40	40	20	5	80	160	10	5	5	40		5	20	80	20	40	5	40	40	40	20	5	160	80	40	5	20	160	40
114	2015	21	10	80	80			80	80		80	160	80	160	80	40	80	80	40	80	80	80	160	5	160	320	80	5	160	160		80	160	80	80	160	5	320	80	160	640	5	320	320	80	320	40	320	80
114	2016	0	10	40	20	80		20	40		40	40	80		40	20	20	20	20	40	20	40	20	20	80	40	20	5	40	160		40	20	80	40	40	5	80	80	40	80	5	5	80	40	80	40	160	40
114	2016	21	10	80	80	80		80	80		40	160	80		160	80	160	40	80	160	80	80	40	40	160	80	40	5	80	160		40	40	160	80	160	5	160	80	80	160	20	5	160	80	160	160	160	160
74	2013	0	10	5	160			80				80			80	80		40	320	160	160	20		10		40	5	10	5	40				10		160	40	20	5	160	5	5	40			160	80	80	40
74	2013	21	10	10	320			640				160			320	80		40	320	320	160	40		20		80	5	10	80	80				20		320	80	40	5	320	320	5	40			160	160	160	160
74	2014	0	80	10	80			40	80		10	80	80	40	80	160	20	20	160	160	80	20	5	160	80	40	160	40	80	80		40	5	40	20	80	10	20	10	160	80	10	40	160	80	40	80	160	10
74	2014	21	40	5	160			40	80		10	80	80	40	80	160	40	20	160	320	80	40	5	80	160	40	160	40	160	80		40	5	80	5	160	10	80	20	160	80	10	40	320	80	5	80	320	20
74	2015	0	20	10	80			40	40		10	80	80	40	80	80	20	80	160	40	160	10	5	5	80	80	5	40	40	80		40	5	20	5	80	40	40	10	80	80	5	80	80	80	80	40	160	20
74	2015	21	20	5	160			20	20		10	80	80	80	160	80	160	40	160	80	160	10	5	10	80	320	5	20	320	160		20	5	20	5	160	40	320	20	160	640	5	320	320	40	320	80	640	40
87	2013	0	20	40	320	80	40	160	80		10	40	160	80	40	40		20	160	80	160	5	5	160	40	20	640	5	40	20	5	160	10	160	5	40	40	80	20	80	40	5	80		160	40	20	320	160
87	2013	21	40	20	160	80	80	160	160		10	80	160	80	80	40		20	80	160	160	5	10	160	40	20	320	5	80	40	5	160	20	40	10	80	80	160	40	160	80	10	40		160	80	40	160	160
87	2015	0	20	20	160			160	40		5	40	80	40	40	40	40	10	40	20	80	5	5	20	80	80	5	5	40	40		160	5	40	5	40	40	40	20	40	40	5	80	40	80	5	20	160	40
87	2015	21	20	20	320			40	40		5	160	80	640	160	80	640	80	80	80	160	5	40	20	80	1280	80	20	320	160		160	40	40	20	80	40	2560	80	160	640	5	1280	1280	80	320	80	1280	80
87	2016	0	20	20	80	80		160	80		5	80	80		80	80	320	40	80	40	40	5	20	40	80	80	40	20	160	40		80	20	80	40	80	80	160	80	80	640	5	40	160	80	320	80	320	80
87	2016	21	40	40	160	80		160	80		5	160	80		320	160	320	40	80	320	80	5	20	20	80	80	40	20	160	160		80	20	80	20	160	80	160	80	160	640	5	40	160	80	320	160	160	160
78	2013	0	40	20	160	80	5	160	40		20	10	80	10	40	80		80	80	20	320	40	5	80	10	20	20	10	40	5	20	40	5	80	10	10	160	160	5	40	80	40	10		80	40	5	40	40
78	2013	21	40	20	320	80	20	320	80		40	40	160	20	80	80		160	160	160	320	80	10	160	40	40	80	20	320	40	40	80	5	40	20	40	160	320	10	160	160	80	320		160	160	40	80	160
78	2015	0	40	5	320			160	40		5	20	80	5	40	40	20	160	80	10	160	80	5	20	20	10	5	20	80	20		40	5	40	5	10	160	160	5	10	80	20	20	20	80	80	5	40	40
78	2015	21	40	5	320			320	40		5	40	80	10	80	80	320	160	80	40	160	80	5	5	40	20	5	40	320	80		80	5	40	5	640	160	1280	5	80	640	40	80	80	80	320	40	320	80
78	2016	0	40	10	640	80		320	80		20	80	80		20	160	80	80	160	40	80	40	5	20	20	10	5	20	160	80		80	5	80	5	40	320	160	5	40	320	40	320	5	80	160	80	40	160
78	2016	21	40	20	320	80		320	40		20	80	80		160	320	320	160	320	160	160	80	5	20	40	10	5	20	160	80		80	5	80	5	80	320	320	5	40	320	40	320	20	80	320	320	20	160
76	2013	0	5	20	80	5	10	5	20		5	80	5	20	80	40		10	160	160	160	5	80	40	5	10	40	5	10	40	5	5	40	40	20	80	5	5	40	160	20	5	40		10	10	40	80	40
76	2013	21	20	10	80	5	40	10	5		5	80	10	20	80	40		10	160	160	80	5	80	20	5	10	160	5	40	40	5	5	80	10	40	160	10	40	40	160	40	5	10		10	40	40	80	40
76	2014	0	40	10	40			5	10		5	80	10	20	40	40	20	5	80	160	40	10	10	40	5	40	160	5	40	40		5	80	20	5	80	5	40	40	80	80	5	5	80	10	160	40	160	10
76	2014	21	20	5	40			5	20		5	80	10	40	80	80	20	5	80	160	40	40	320	40	5	40	160	5	80	80		5	160	40	160	80	5	40	40	160	320	5	5	160	10	640	40	80	10
76	2016	0	20	10	80	10		10	10		5	160	10		160	80	20	20	160	160	80	10	40	20	5	40	20	5	20	80		5	40	20	80	160	20	40	40	80	80	5	20	20	10	80	160	80	40
76	2016	21	20	20	80	20		20	20		5	320	20		160	160	160	20	320	320	80	10	40	20	5	80	40	5	80	80		5	80	40	160	160	40	40	40	80	320	5	20	80	20	160	320	80	80
66	2013	0	5	20	80	5	40	5	5		5	10	5	80	5	20		5	40	80	80	5	5	5	5	5	80	5	5	5	5	5	5	5	5	20	5	80	20	40	20	5	5		5	5	5	80	40
66	2013	21	5	20	80	5	80	20	5		5	40	20	80	80	20		10	80	160	40	10	10	10	5	10	320	5	80	40	5	5	10	5	10	80	5	160	40	160	80	5	10		5	80	40	160	40
66	2014	0	5	5	40			5	20		10	20	10	80	10	10	40	5	20	80	20	10	5	5	5	20	160	10	40	20		20	10	5	10	20	10	80	40	40	40	10	5	80	20	80	20	320	10
66	2014	21	40	10	80			20	40		20	40	20	160	40	40	80	20	40	160	40	20	5	5	5	40	320	20	160	40		20	20	5	20	40	10	160	20	80	40	10	10	160	20	80	40	160	20
66	2016	0	10	10	40	5		5	5		5	20	5		80	40	80	20	80	20	20	10	5	20	5	20	20	5	80	20		5	5	5	10	20	5	160	20	20	160	5	5	40	5	160	40	80	40
66	2016	21	20	20	80	5		40	5		5	80	10		80	80	160	20	160	80	40	10	5	20	5	20	20	5	80	80		10	5	20	10	80	5	160	20	40	320	5	5	40	5	160	160	40	80
70	2013	0	20	10	20	20	40	10	5		40	10	5	20	20	5		10	10	80	40	10	40	40	20	5	40	10	10	10	5	20	10	40	10	10	10	40	10	40	10	5	20		5	10	10	80	40
70	2013	21	40	10	20	20	80	20	10		80	20	10	40	40	10		10	20	80	80	10	40	40	40	5	160	20	80	20	5	20	20	10	10	40	10	80	20	80	20	10	5		10	40	20	160	80
70	2015	0	40	5	10			10	10		40	10	5	20	20	10	10	20	5	10	20	10	10	5	40	40	10	40	20	10		20	10	10	10	10	20	20	5	20	20	5	40	20	5	20	5	40	80
70	2015	21	40	10	40			20	10		40	40	5	160	40	40	40	20	20	20	40	20	20	5	40	640	5	40	320	40		20	20	5	20	20	10	160	40	40	320	5	640	160	10	320	20	640	40
69	2013	0	5	5	5			20				20			20	5		40	40	80	40	10		5		20	5	5	40	10				5		20	5	40	10	40	40	5	5			40	10	20	80
69	2013	21	5	10	10			20				20			20	5		40	40	80	80	20		5		80	20	10	40	10				5		20	5	20	20	40	80	5	5			160	10	80	80
69	2016	0	5	5	5	40		10	10		5	40	80		40	10	10	10	40	40	10	5	10	5	5	10	5	5	20	20		5	10	5	20	40	5	20	5	20	40	5	5	10	80	40	80	20	80
69	2016	21	5	5	20	80		40	20		5	80	80		80	20	80	20	80	80	20	5	10	5	20	20	10	5	40	20		20	10	10	20	40	5	40	10	20	160	5	5	10	80	80	80	10	80
119	2013	0	5	5	10	10	10	10	10		10	20	10	10	20	5		40	40	40	80	20	40	5	5	10	20	5	20	10	5	5	20	10	20	20	10	40	20	40	10	5	10		10	10	10	20	40
119	2013	21	5	5	20	20	10	20	20		20	20	20	20	40	5		40	40	80	80	20	20	5	5	5	20	5	20	20	5	5	10	5	20	20	20	160	10	80	40	10	5		20	20	20	20	80
119	2014	0	5	5	10			10	10		10	20	10	10	20	5	10	20	10	40	10	20	20	5	5	5	40	5	20	20		5	20	5	20	10	10	40	5	20	5	10	5	10	10	5	20	40	10
119	2014	21	5	5	10			40	20		20	80	20	20	160	20	20	20	80	320	40	40	80	5	5	5	40	5	160	160		10	20	10	40	80	20	160	10	160	5	20	5	40	20	20	80	40	40
119	2016	0	5	5	5	20		20	10		10	20	20		40	10	20	40	40	20	5	20	10	5	5	5	5	5	20	5		5	5	10	10	40	20	40	5	20	40	5	20	5	10	40	40	10	40
119	2016	21	5	5	10	20		20	10		20	40	20		80	10	20	40	40	40	20	20	10	5	5	5	5	5	20	20		5	5	10	10	40	40	40	10	40	80	5	20	5	10	40	80	5	80
120	2013	0	5	5	40			5				40			80	20		5	40	160	80	5		5		5	5	5	5	20				5		80	5	5	5	80	5	5	5			5	20	5	40
120	2013	21	5	5	40			40				40			80	20		5	80	160	160	5		5		5	5	5	5	20				5		80	5	40	5	80	40	5	5			80	20	40	40
120	2014	0	10	5	20			10	20		5	20	20	10	40	40	10	5	20	80	40	5	5	5	5	10	40	10	20	40		5	5	5	5	40	5	5	10	40	5	5	5	40	20	5	20	40	10
120	2014	21	10	5	20			20	20		5	40	20	10	80	40	10	5	20	160	40	10	20	5	5	10	40	10	40	40		5	5	5	10	40	5	20	5	80	5	5	5	80	20	40	40	40	10
120	2015	0	5	5	40			10	5		5	20	20	5	40	20	10	10	20	20	40	5	5	5	5	5	5	5	5	40		5	5	5	5	40	5	5	5	20	10	5	20	20	10	10	10	10	20
120	2015	21	10	5	40			160	10		5	80	20	20	160	160	80	10	80	80	80	5	10	10	10	40	10	10	160	160		10	10	10	5	160	5	160	5	160	320	5	80	160	20	160	80	80	80
121	2013	0	40	10	20	80	5	20	20		10	10	80	20	40	10		10	40	160	80	5	10	40	10	5	40	5	5	10	5	20	5	40	5	20	20	20	5	80	5	5	5		80	5	10	10	80
121	2013	21	40	10	10	40	10	20	20		40	20	80	20	40	10		10	40	80	80	5	10	40	10	5	80	5	5	10	10	20	5	20	5	40	40	40	10	80	5	5	40		80	5	10	20	80
121	2014	0	80	5	10			20	40		20	10	80	20	20	10	5	5	10	160	20	5	5	80	5	20	80	5	5	20		40	5	40	5	20	5	40	10	40	80	5	20	20	80	80	10	20	10
121	2014	21	80	5	10			40	40		20	40	80	20	80	10	10	5	20	160	40	10	5	40	10	20	80	5	40	80		40	5	40	5	40	5	40	10	160	320	5	20	80	80	640	40	80	20
133	2013	0	5	5	160			5				160			160	40		10	320	160	160	5		5		40	40	5	20	80				10		160	40	40	40	320	20	5	20			80	80	80	40
133	2013	21	5	10	160			320				160			320	80		20	160	320	160	5		10		160	80	5	80	160				20		320	80	80	80	320	40	5	40			320	160	320	80
133	2014	0	5	5	40			10	80		80	80	160	160	160	80	10	5	160	160	80	10	80	40	80	20	320	5	40	160		40	10	40	10	160	5	40	80	160	160	5	40	40	80	40	80	160	10
133	2014	21	5	5	160			40	80		80	320	160	160	320	160	5	5	320	640	160	10	80	80	160	20	320	5	80	320		80	20	80	20	320	5	80	80	640	80	5	40	160	80	40	320	320	20
133	2015	0	5	5	160			10	40		80	160	160	320	320	80	20	20	320	160	80	10	10	5	160	80	80	5	40	320		40	5	5	5	160	80	40	40	320	80	5	80	40	80	80	160	160	40
133	2015	21	5	10	160			40	40		80	320	80	320	320	80	20	40	320	160	160	40	10	5	80	320	320	10	160	640		40	10	10	10	40	40	160	160	320	320	5	320	40	80	320	160	640	80
135	2013	0	40	10	80	80	80	20	10		80	80	40	80	80	80		80	80	160	80	20	20	80	5	20	40	5	20	40	40	40	5	80	10	80	10	80	40	160	20	5	40		80	40	40	320	80
135	2013	21	40	20	80	80	160	40	80		160	80	80	80	80	80		80	320	320	160	20	20	80	5	20	320	5	80	40	40	40	5	10	10	80	10	160	40	160	80	20	10		80	80	40	320	80
135	2015	0	40	10	160			20	40		160	80	80	80	80	80	40	160	320	80	160	40	5	20	40	80	10	10	40	160		80	5	20	5	40	20	160	20	160	40	5	160	80	40	80	40	160	40
135	2015	21	40	10	80			20	40		160	80	80	160	80	80	40	320	320	80	160	40	5	20	80	320	40	10	160	160		40	5	20	10	80	20	320	20	160	80	5	320	160	40	160	40	320	40
135	2016	0	40	10	80	80		20	40		80	80	40		40	80	80	80	320	80	80	20	20	40	40	20	20	10	80	160		40	5	40	5	80	40	80	20	80	80	20	80	80	40	160	80	160	80
135	2016	21	40	20	80	80		40	80		80	80	40		160	160	80	80	320	160	80	20	20	40	40	40	20	10	80	80		40	5	40	10	80	40	160	20	80	160	10	40	80	40	160	160	80	80
67	2013	0	10	20	20	20	10	20	20		5	320	40	40	160	10		5	160	640	80	5	40	40	5	10	80	5	10	320	5	10	20	40	5	320	5	40	40	640	10	5	10		40	10	320	40	320
67	2013	21	10	10	20	10	40	40	20		10	320	40	40	320	10		5	160	640	80	5	40	40	5	10	160	5	20	160	5	10	40	20	10	320	10	40	40	640	20	5	20		40	20	160	80	320
67	2015	0	20	10	10			20	10		5	160	40	40	320	10	5	5	80	160	20	5	40	10	5	40	20	10	5	160		5	20	40	20	20	10	10	5	320	20	5	40	20	20	20	80	40	160
67	2015	21	10	10	40			160	10		5	320	40	160	640	20	320	5	160	320	80	5	160	10	20	640	80	10	640	640		5	160	20	160	320	10	640	80	320	640	5	1280	640	20	640	320	1280	320
67	2016	0	10	10	10	20		40	20		5	320	20		1280	40	40	5	320	320	20	5	10	10	10	20	40	5	80	160		5	40	20	40	320	5	80	40	160	160	5	5	40	20	160	640	160	320
67	2016	21	5	10	10	20		40	20		5	320	20		640	20	40	5	320	320	20	5	5	10	10	40	20	5	40	320		5	20	40	40	320	5	80	40	160	160	5	5	40	20	160	640	40	320
34	2013	0	80	20	80	20	20	40	40		160	80	40	5	40	80		10	160	80	160	10	20	20	10	40	20	5	10	40	40	20	20	40	20	80	80		10	40	20	5	10		40	10	80	80	80
34	2013	21	80	20	80	20	10	40	20		80	80	80	20	80	80		5	80	80	160	20	10	40	10	80	10	5	5	40	20	20	20	20	10	80	80		5	80	20	10	80		20	10	80	40	80
34	2014	0	160	10	80			20	20	80	320	80	160	5	80	80	40	20	160	80	160	40	20	80	20	40	20	5	10	20		20	40	40	20	160	320	80	40	80	80	5	80	20	20	40	80	40	160
34	2014	21	80	10	80			20	40	80	160	80	80	10	80	80	20	20	160	80	160	40	20	80	40	40	10	5	10	20		20	40	40	20	160	160	40	20	160	40	5	40	20	40	80	80	80	160
34	2015	0	80	10	80			40	20	40	5	80	40	20	40	80	10	10	40	80	80	10	5	40	20	5	5	5	5	40		20	20	40	10	80	160	20	5	20	10	5	10	20	20	20	320	40	160
34	2015	21	80	10	80			40	20	80	160	80	80	20	40	80	20	10	40	80	80	10	10	40	20	40	5	5	40	80		20	20	40	20	80	160	40	5	40	80	5	20	40	20	40	160	80	160
34	2016	0	80	20	40	20		40	40	80	160	40	40		40	40	20	10	40	40	80	10	20	80	20	10	5	5	10	20		40	10	40	10	40	160	80	5	40	40	5	160	20	40	80	20	40	40
34	2016	21	80	20	80	40		80	40	80	80	40	40		80	40	40	20	40	40	80	10	20	160	20	10	5	5	20	40		40	20	40	10	40	160	80	5	40	80	5	160	40	40	80	20	40	80
105	2013	21	5	5	5	10	20	10	5		5	5	40	10	10	5		20	20	20	20	5	40	5	5	5	40	5	10	5	5	5	40	5	5	5	5	5	10	20	5	5	10		20	10	5	20	5
105	2014	0	5	10	5			5	10		5	5	20	5	10	5	20	10	10	20	10	5	5	5	10	5	20	5	5	5		5	40	5	20	5	5	40	5	10	10	5	20	40	20	10	5	40	5
105	2014	21	5	5	5			20	20		5	20	40	10	20	5	20	10	20	40	10	5	20	5	40	5	40	10	40	20		5	40	5	40	10	5	80	10	40	40	5	20	80	20	160	10	40	5
105	2015	0	5	5	5			10	5		5	10	20	5	10	5	5	20	10	5	20	5	20	5	20	10	5	5	5	10		5	20	5	20	5	5	5	5	10	10	5	20	20	20	10	5	20	5
105	2015	21	5	5	20			20	10		5	20	20	20	20	5	80	40	20	10	10	5	40	5	40	40	5	10	20	40		5	40	5	40	20	10	80	5	20	40	5	80	80	20	40	5	80	20
128	2013	0	5	5	10	40	80	5	20		5	40	80	80	40	5		20	10	80	40	5	10	10	10	5	80	5	20	20	5	10	5	10	20	40	5	40	40	80	20	5	160		80	10	20	160	80
128	2013	21	10	5	10	40	80	5	20		5	40	80	160	80	5		40	20	160	40	10	20	10	10	5	80	10	10	40	5	10	10	5	10	40	10	80	40	160	20	10	5		80	20	40	160	40
128	2014	0	20	5	5			5	40		5	40	80	160	80	5	20	10	20	80	10	10	10	20	10	10	320	20	40	40		20	5	20	10	40	5	80	20	160	5	5	20	320	80	80	40	640	20
128	2014	21	10	5	10			10	20		5	40	80	80	80	10	20	20	20	160	20	10	5	40	40	10	320	20	80	40		10	5	20	10	40	10	20	20	80	160	10	20	160	80	160	40	640	20
128	2016	0	5	5	10	40		5	20		5	80	40		160	20	80	20	40	160	20	10	10	5	20	20	10	10	40	320		10	5	10	5	80	10	40	10	80	160	5	5	80	40	80	160	80	80
128	2016	21	5	5	20	40		10	20		5	80	40		160	20	80	20	40	160	20	5	20	5	20	40	10	10	80	80		10	5	10	5	80	10	80	10	80	160	5	5	80	40	80	160	80	80
103	2013	0	5	5	10	20	20	40	10		5	5	20	80	5	5		10	10	20	20	10	40	10	5	5	160	5	10	5	5	5	160	10	320	5	5	40	80	40	40	5	40		20	40	5	160	40
103	2013	21	10	10	20	20	10	10	20		5	10	40	80	80	5		20	20	160	40	10	160	10	5	5	320	5	10	10	5	5	160	5	80	20	5	80	80	80	20	10	5		40	40	10	80	40
103	2015	0	5	10	10			10	10		5	160	20	80	10	5	20	40	10	5	20	5	80	10	5	80	40	10	10	20		5	80	10	80	5	5	40	40	10	40	5	80	40	20	80	5	160	20
103	2015	21	10	20	40			20	10		40	40	40	80	80	160	40	160	40	40	160	20	80	20	20	80	80	20	40	160		5	80	20	80	80	5	160	40	80	80	5	160	80	40	80	40	160	80
103	2016	0	10	10	10	20		20	20		5	10	20		10	5	20	40	10	10	10	5	80	20	5	20	40	5	20	20		5	40	10	80	10	5	40	40	20	80	5	5	20	20	160	20	80	40
103	2016	21	20	20	20	40		40	20		10	20	40		40	20	80	40	40	40	40	20	160	20	10	40	80	10	40	20		5	80	40	160	20	10	80	80	20	160	10	10	40	40	160	40	40	80
42	2013	0	5	5	20	160	40	20	80		10	40	320	5	40	20		5	20	40	80	20	5	40	5	5	20	5	20	20	5	10	5	5	5	20	20		10	40	20	5	20		320	20	80	160	40
42	2013	21	5	5	20	80	80	20	80		5	80	320	20	80	20		5	40	80	80	20	5	5	5	5	20	5	20	40	5	20	5	5	5	80	10		10	80	40	5	10		320	20	160	160	80
42	2015	0	5	5	10			10	40	20	10	80	320	10	40	40	20	5	20	80	10	20	5	5	5	20	5	5	10	20		5	5	5	5	40	20	40	5	20	80	5	20	20	320	20	320	40	160
42	2015	21	5	5	40			40	40	40	5	160	320	80	160	40	160	10	40	160	80	20	5	5	5	320	5	5	160	160		10	5	5	5	160	40	320	5	160	160	5	160	320	320	320	320	640	160
42	2016	0	5	5	20	160		20	80	20	10	40	160		40	10	40	5	20	40	80	10	5	10	10	40	5	5	40	40		20	5	5	5	40	40	160	5	40	80	5	20	80	320	160	20	80	40
42	2016	21	5	10	40	160		40	80	80	10	80	160		80	40	80	10	40	80	80	20	5	10	20	40	5	5	80	80		20	5	10	5	80	40	160	5	80	160	5	20	80	320	160	40	160	80
52	2013	0	5	5	40	5	5	5	5		5	40	5	5	40	40		20	320	40	160	20	5	10	5	5	5	5	10	10	40	5	5	5	5	40	5		5	40	10	10	5		5	10	80	10	20
52	2013	21	5	5	160	5	20	20	5		5	160	5	5	320	160		10	640	160	320	20	5	5	5	5	5	5	20	20	40	5	5	5	5	160	5		5	80	80	5	5		5	40	80	80	40
52	2014	0	5	5	40			5	5	20	5	40	20	10	80	40	20	20	320	80	80	40	5	5	5	5	5	5	5	5		5	5	5	5	160	5	80	5	20	10	5	20	5	10	40	80	5	20
52	2014	21	5	5	80			5	5	40	5	40	5	10	80	40	40	20	320	80	80	80	5	5	5	5	5	5	20	5		5	5	5	5	160	5	80	5	40	320	5	80	10	5	80	40	40	20
52	2015	0	5	5	40			5	5	40	5	80	10	5	160	80	20	20	160	160	80	40	5	5	5	10	5	5	40	40		5	5	5	5	80	5	40	5	40	40	5	20	20	5	40	320	40	160
52	2015	21	5	5	40			10	5	40	5	80	5	5	160	80	160	10	320	80	80	40	5	5	5	80	5	5	160	40		5	5	5	5	80	5	320	5	20	160	5	80	160	5	160	160	320	160
52	2016	0	5	5	40	5		20	10	40	5	20	5		40	40	40	20	160	20	80	20	5	10	5	5	5	5	40	5		5	5	10	5	40	10	160	5	5	40	5	10	10	5	160	5	40	10
52	2016	21	5	5	80	10		80	10	80	5	80	10		160	40	1280	20	320	80	80	40	10	10	5	160	10	5	640	20		10	10	10	5	80	10	2560	5	10	2560	10	20	640	10	2560	5	640	20
109	2013	0	10	10	40	10	10	20	10		20	10	10	160	10	10		5	80	40	80	40	5	40	5	5	160	5	40	5	5	5	40	20	160	10	5	80	80	40	40	20	40		10	20	5	160	80
109	2013	21	20	20	40	10	10	20	10		10	40	20	160	40	10		5	80	160	80	40	80	20	5	10	320	5	40	20	10	10	40	10	20	40	10	160	80	80	40	40	10		20	40	20	160	80
109	2014	0	10	20	20			20	10		10	10	10	80	20	20	20	5	40	160	40	40	20	40	5	40	320	20	40	20		10	40	10	40	20	40	40	80	40	20	40	5	40	10	20	10	640	20
109	2014	21	80	10	80			40	40		20	40	20	160	40	80	40	5	80	160	160	80	80	40	10	40	640	40	160	80		10	80	40	80	40	80	160	80	160	320	80	5	80	20	320	40	320	40
109	2016	0	20	20	40	10		40	10		10	40	20		40	20	20	5	40	40	40	80	40	20	5	20	40	20	40	80		5	20	20	40	40	20	80	40	40	160	40	10	20	5	160	80	80	80
109	2016	21	20	20	80	20		40	20		10	80	20		160	80	80	10	160	80	160	80	80	20	10	20	80	20	80	80		5	40	40	80	80	20	80	40	40	320	40	10	20	20	160	160	20	80
75	2013	0	5	10	20	10	10	80	5		5	20	10	5	10	5		5	80	80	80	5	5	5	10	5	5	5	5	10	5	10	5	5	5	40	5	20	5	40	5	5	5		10	10	20	20	10
75	2013	21	5	5	40	10	20	160	5		5	20	20	5	40	20		5	80	80	80	5	5	10	20	5	5	5	40	40	5	20	5	5	5	40	5	80	5	80	40	5	5		20	40	20	40	40
75	2014	0	5	5	10			80	5		5	10	10	5	10	20	10	5	20	160	20	10	5	5	20	10	5	5	20	20		10	5	10	40	20	5	40	5	20	40	5	20	40	20	80	10	20	5
75	2014	21	5	5	40			160	10		5	40	20	10	40	40	80	5	80	160	80	80	5	20	160	10	5	5	160	80		40	20	80	40	40	5	160	5	80	80	5	80	320	20	160	40	80	20
75	2016	0	5	10	40	10		80	5		5	40	10		80	40	20	5	80	80	40	5	5	5	20	5	5	5	20	40		10	5	10	5	40	5	20	5	40	40	5	5	10	10	40	80	10	20
75	2016	21	10	20	40	10		160	10		5	80	5		320	80	320	20	160	160	80	5	5	5	40	80	5	5	160	40		10	5	40	5	80	10	80	5	40	320	5	5	320	5	160	160	320	40
92	2013	0			20							20			20	10			80	80	80									10						20				40							10		80
92	2013	21			40							20			40	20			80	80	80									20						20				80							20		80
99	2014	0	40	5	10			10	20		10	40	40	40	80	10	20	20	20	80	10	10	5	40	40	10	160	10	40	40		80	10	10	10	40	10	80	40	80	20	10	40	80	40	80	40	160	40
99	2014	21	40	5	10			20	20		10	40	40	80	80	20	40	10	20	160	20	40	10	40	80	10	160	20	160	80		40	10	5	20	80	10	160	20	160	80	10	40	160	40	320	40	320	40
99	2015	0	20	5	10			5	5		5	20	20	40	40	5	40	20	40	20	40	5	5	5	20	40	5	10	10	40		20	5	5	5	40	5	80	5	40	20	5	40	40	20	20	20	80	40
99	2015	21	40	5	40			20	10		10	40	40	80	40	20	160	80	40	40	40	5	5	5	40	160	20	20	80	80		40	5	5	5	80	10	320	20	80	160	5	320	160	40	160	40	320	40
99	2016	0	40	5	10	20		20	20		10	40	40		80	20	40	80	40	20	20	10	20	5	40	20	10	10	80	40		40	5	10	10	40	20	80	40	40	80	5	20	80	20	160	80	80	80
99	2016	21	40	5	40	20		40	20		10	80	40		160	40	80	80	80	80	40	10	20	10	40	40	20	10	80	160		40	5	20	10	80	20	80	20	40	80	5	20	80	40	80	160	80	160
113	2013	0	20	5	80	40	10	40	40		10	40	80	40	40	40		5	320	80	80	320	20	0	5	5	80	10	10	20	40	40	40	5	80	80	20	80	20	40	20	160	10		40	10	20	20	40
113	2013	21	20	5	80	20	20	20	20		5	40	40	40	40	40		5	320	160	80	320	40	20	5	5	160	20	20	20	40	40	20	5	10	80	40	80	20	80	20	160	20		40	20	20	40	40
113	2016	0	20	5	40	20		20	20		5	40	40		80	40	10	5	160	40	40	160	20	10	40	10	5	80	20	40		20	20	10	20	40	40	40	10	40	80	80	40	20	20	80	40	40	40
113	2016	21	20	5	160	40		40	20		5	80	40		160	160	160	5	640	160	80	320	40	10	40	10	10	40	160	80		20	20	20	20	80	40	160	20	40	320	80	40	20	40	160	40	20	40
26	2014	0	5	5	160			5	10	80	5	320	20	40	640	160	5	20	320	320	320	20	5	5	5	5	5	5	5	80		5	5	5	5	320	10	40	5	320	5	5	20	20	20	10	320	5	160
26	2014	21	5	5	320			10	10	160	5	640	40	40	1280	160	40	20	320	640	320	20	5	5	5	5	5	5	10	80		5	5	5	5	320	10	80	5	320	40	5	40	20	20	40	320	20	320
26	2015	0	5	5	160			5	5	80	5	320	40	10	320	160	20	20	160	320	160	10	5	5	5	5	5	5	20	160		5	5	5	5	320	10	40	5	80	20	5	5	20	5	20	160	5	160
26	2015	21	5	5	160			40	5	160	5	320	40	20	640	160	40	20	320	320	160	10	5	5	5	10	20	5	80	320		5	5	5	5	320	10	80	5	160	80	5	10	20	5	80	320	40	320
26	2016	0	5	5	80	10		20	10	80	5	160	20		160	80	20	20	160	160	160	10	5	5	5	5	5	5	20	80		5	5	5	5	160	10	80	5	80	20	5	5	5	20	40	40	10	80
26	2016	21	5	10	160	20		40	20	160	5	320	20		320	80	80	20	160	320	160	10	5	10	5	5	5	5	80	160		10	5	5	5	320	20	160	5	160	320	5	5	20	20	160	160	40	160
37	2014	0	160	40	160			20	80	160	20	320	160	40	1280	160	80	40	640	320	320	20	40	40	5	80	40	5	20	40		5	20	80	20	320	40	80	160	160	160	5	320	40	80	40	80	160	320
37	2014	21	160	40	320			40	80	320	5	320	160	80	1280	160	160	40	640	640	640	40	80	80	5	40	80	5	80	40		5	40	80	40	640	80	160	160	320	320	5	640	80	80	160	160	320	640
37	2015	0	80	5	320			40	5	320	20	320	80	160	1280	320	20	20	640	640	320	10	20	40	5	5	5	5	20	80		5	20	80	10	640	40	20	5	80	20	5	40	40	80	10	320	160	320
37	2015	21	40	20	320			40	5	320	10	320	40	320	1280	320	160	20	640	640	320	20	40	5	5	160	80	5	80	160		5	40	40	40	640	40	320	40	80	80	5	160	160	20	160	160	320	320
37	2016	0	80	40	320	40		40	40	320	20	320	80		640	160	40	40	640	320	320	20	80	80	5	80	20	5	80	80		5	20	80	20	320	80	160	5	80	160	5	80	80	80	80	40	160	160
37	2016	21	80	40	320	40		160	80	320	20	320	80		1280	160	320	20	640	320	320	20	80	80	40	80	80	5	160	160		20	40	80	40	320	80	320	20	320	320	5	80	160	80	320	80	320	160
65	2014	0	5	5	10			40	20	5	20	10	80	5	10	10	80	80	40	10	80	20	5	5	5	5	5	20	40	5		10	5	5	5	80	80	80	5	20	160	5	40	40	40	160	40	160	40
65	2014	21	5	5	160			40	40	80	20	80	40	5	80	80	160	80	80	160	160	20	5	5	5	10	5	20	40	40		10	10	5	10	160	80	160	5	320	320	5	80	80	40	320	160	160	80
65	2015	0	5	5	20			40	10	5	10	20	40	20	10	20	40	80	5	10	20	10	5	5	20	80	5	5	40	20		20	5	5	5	10	40	40	5	10	40	5	40	40	20	40	320	160	40
65	2015	21	5	5	80			80	10	80	5	80	40	20	40	80	80	20	10	80	80	20	5	5	20	160	5	5	160	160		20	5	5	10	80	40	320	5	40	160	5	40	160	20	160	160	320	80
65	2016	0	5	5	10	20		40	20	10	5	20	5		20	10	40	80	10	20	20	5	5	10	20	40	5	20	80	10		40	5	5	5	20	40	160	5	20	160	5	40	80	20	160	10	160	20
65	2016	21	5	10	80	40		80	40	40	20	40	40		40	40	320	40	20	40	80	10	5	20	40	40	10	20	160	80		40	5	20	5	40	40	640	5	80	640	5	40	160	20	320	40	320	40
21	2014	0	20	10	160			5	5	40	5	320	5	20	320	80	5	40	160	320	320	10	5	10	5	10	5	5	5	160		5	5	10	5	320	20	40	5	320	40	5	40	20	5	40	320	80	160
21	2014	21	20	5	160			10	20	80	5	320	5	40	320	80	20	40	160	640	160	20	5	10	5	20	5	5	10	160		5	5	10	5	320	40	80	5	640	320	5	40	40	5	80	320	80	320
21	2015	0	10	5	80			5	5	80	5	320	5	5	320	160	5	40	40	320	320	5	5	5	5	5	5	5	10	640		5	5	5	5	640	10	5	5	320	20	5	10	5	5	20	640	40	320
21	2015	21	10	5	160			20	5	80	5	640	5	20	640	320	20	40	80	640	320	5	5	5	5	40	5	5	40	1280		5	10	20	10	640	20	80	5	640	80	5	40	40	5	80	640	160	640
21	2016	0	10	10	80	5		10	5	80	5	160	5		320	80	5	20	40	320	160	5	5	20	5	20	5	5	10	320		5	5	10	5	320	20	80	5	320	40	5	20	20	5	40	160	80	160
21	2016	21	10	10	80	5		20	10	80	5	320	5		320	80	40	20	40	320	160	10	5	20	5	20	5	5	40	640		5	5	10	5	320	20	80	5	320	80	5	20	40	5	80	320	80	160
38	2014	0	5	5	40			10	80	20	5	20	40	5	40	20	40	40	80	20	80	80	5	5	5	5	5	20	10	5		5	5	5	5	160	5	80	5	40	80	20	40	20	80	20	80	5	80
38	2014	21	5	10	80			20	80	20	5	80	40	5	80	40	40	40	80	80	160	80	5	5	10	5	5	10	20	20		10	10	5	5	160	10	80	5	160	80	10	40	20	40	40	80	20	80
38	2015	0	5	5	80			20	20	20	5	80	20	5	40	40	10	20	20	40	40	40	5	5	5	5	5	5	10	20		5	5	5	5	40	5	20	5	20	20	10	5	10	20	20	320	5	160
38	2015	21	5	5	80			40	20	40	5	40	20	5	80	40	80	20	20	40	80	40	5	5	10	20	5	5	80	40		5	5	5	5	40	5	160	5	20	160	5	40	40	20	80	160	160	80
38	2016	0	5	5	40	20		20	20	20	5	20	20		40	10	20	20	10	20	40	40	5	5	10	5	5	10	40	20		20	5	5	5	20	10	160	5	20	80	10	5	20	40	80	10	40	20
38	2016	21	5	10	40	40		80	40	40	5	40	20		80	20	80	20	20	20	40	40	5	10	40	10	5	10	80	40		20	5	10	5	20	10	160	5	40	160	20	5	40	20	160	20	40	40
55	2014	0	5	5	80			40	20	40	5	20	40	5	20	40	80	160	80	40	80	80	5	10	5	5	5	160	20	10		5	5	5	10	160	10	160	10	40	80	40	80	20	40	80	40	20	40
55	2014	21	5	5	160			40	40	80	5	80	80	10	40	40	160	160	80	160	160	80	10	5	5	5	5	160	80	40		5	10	5	20	160	10	160	10	160	160	40	40	20	80	160	160	40	80
55	2015	0	5	5	160			80	10	40	5	80	40	5	40	80	20	80	20	40	80	40	5	5	5	5	5	160	20	40		5	5	5	5	40	5	40	5	40	40	5	10	20	40	40	320	10	160
55	2015	21	5	5	160			160	20	80	5	160	40	5	80	80	80	160	20	160	80	40	5	10	5	20	5	80	80	160		5	5	5	5	80	5	160	5	80	80	5	20	20	40	160	320	80	320
55	2016	0	10	10	80	40		160	40	80	5	20	40		20	40	40	160	20	20	80	40	10	20	5	5	5	160	80	40		10	5	10	5	40	20	320	5	40	160	20	10	10	40	160	20	20	40
55	2016	21	10	10	160	40		320	40	160	10	80	40		80	80	320	320	40	80	160	80	40	10	10	10	10	160	320	80		10	10	20	10	80	10	640	5	160	320	40	10	40	80	640	80	80	80
104	2013	0	5	20	20			5				20			40	10		160	160	40	80	5		5		160	80	20	40	10				5		40	5	80	80	40	40	5	10			160	10	320	40
104	2013	21	5	10	40			20				40			80	20		80	320	160	80	5		10		160	80	10	80	10				5		80	20	80	80	80	80	5	5			320	10	320	80
104	2015	0	5	10	20			80	5		80	10	5	160	40	20	80	160	80	20	40	5	5	5	5	80	80	10	40	20		5	5	5	5	20	5	40	40	10	80	5	320	80	5	80	5	160	20
104	2015	21	5	5	80			320	5		80	80	5	640	80	20	640	160	160	40	80	5	5	20	20	1280	320	20	640	40		5	5	20	5	80	20	640	160	40	640	5	1280	640	20	640	20	1280	80
104	2016	0	5	10	20	10		80	10		80	40	5		80	40	160	80	160	20	20	5	20	20	5	80	80	5	80	40		5	5	20	5	80	40	80	80	20	320	5	5	160	5	160	40	320	40
104	2016	21	5	10	40	5		160	5		80	80	10		160	80	160	80	320	160	40	5	5	20	20	80	80	10	80	40		5	5	20	5	80	20	80	40	20	320	5	5	160	5	160	80	160	80
23	2014	0	10	5	80			5	40	40	10	160	40	20	160	40	40	40	80	160	160	40	5	10	10	10	40	10	20	5		5	5	5	5	160	10	80	40	40	80	10	160	20	20	80	80	20	40
23	2014	21	10	5	160			80	40	80	10	160	80	20	160	40	160	40	80	160	160	40	10	5	5	20	40	5	40	10		5	10	5	10	160	5	160	40	80	160	10	160	40	40	160	80	80	80
23	2015	0	10	5	80			80	10	40	10	160	40	20	160	40	5	20	20	160	80	20	5	5	5	20	5	5	20	20		5	5	5	5	160	10	20	20	10	20	5	20	5	20	20	160	40	80
23	2015	21	20	5	80			80	20	40	10	160	40	40	160	40	160	20	20	160	80	20	5	10	5	80	20	5	320	40		10	5	10	5	160	20	160	20	20	320	5	40	40	40	160	160	160	160
23	2016	0	20	10	80	40		80	20	80	20	80	40		80	20	40	20	20	80	80	20	10	40	5	20	5	5	40	5		20	5	10	5	80	20	80	10	10	80	5	20	20	40	80	10	40	40
23	2016	21	20	10	80	40		320	40	80	20	80	40		80	20	320	20	40	80	80	20	5	40	10	20	20	5	320	20		20	10	10	5	80	20	160	5	40	320	5	20	40	40	640	10	80	40
100	2014	0	20	20	40			320	20		10	80	20	40	80	40	40	80	160	160	40	10	5	160	40	40	80	80	160	160		20	10	20	20	80	10	80	20	160	80	10	20	160	10	160	80	640	40
100	2014	21	80	10	160			640	80		40	160	40	160	160	320	160	80	320	320	320	40	80	320	320	80	320	80	1280	320		80	40	40	160	160	40	160	80	320	160	40	160	1280	40	640	160	2560	80
100	2015	0	10	5	80			320	5		10	40	10	40	160	40	20	160	160	80	80	5	5	10	5	160	5	40	80	160		10	5	20	5	80	10	40	20	80	80	5	160	80	10	80	80	320	40
100	2015	21	40	40	320			640	5		10	320	20	80	320	160	40	640	640	160	320	20	20	10	20	640	5	160	320	320		40	10	40	10	320	10	640	40	320	320	5	640	320	10	320	160	1280	160
100	2016	0	20	20	80	10		320	10		10	80	10		80	40	40	320	160	80	80	5	20	10	5	40	5	40	80	80		10	5	40	10	80	10	160	20	80	320	5	10	80	10	320	80	160	80
100	2016	21	40	40	320	20		640	20		20	320	10		320	320	640	320	640	320	320	10	40	40	40	160	20	80	320	320		40	10	80	20	320	20	160	40	160	640	10	10	640	20	640	640	640	160
123	2014	0	5	20	160			5	10		5	160	5	40	160	80	40	20	80	320	80	5	5	160	5	20	80	40	320	320		5	10	80	10	160	5	80	20	320	10	5	5	640	10	20	160	1280	80
123	2014	21	5	10	80			5	10		5	160	5	40	160	80	40	20	80	320	80	10	160	40	5	20	40	20	320	320		5	10	80	10	160	5	40	20	320	80	5	5	640	10	80	160	1280	20
123	2015	0	10	20	80			5	5		5	160	5	20	160	40	40	40	160	80	160	5	5	5	5	640	5	40	160	160		5	5	40	5	80	20	20	10	320	320	5	320	160	5	160	160	640	80
123	2015	21	10	20	160			5	5		5	160	5	40	160	40	80	40	160	80	160	5	5	5	5	320	10	40	320	320		5	5	40	5	160	20	80	10	320	320	5	320	640	5	160	160	640	80
123	2016	0	5	20	80	10		10	10		5	160	5		320	160	80	20	160	320	80	5	10	10	5	40	10	5	160	320		5	5	40	5	160	20	40	10	320	320	5	20	320	5	320	640	320	160
123	2016	21	5	20	80	10		10	10		5	320	5		320	80	80	20	160	320	80	5	10	5	5	80	10	5	160	320		5	5	40	5	160	40	40	10	160	320	5	20	320	5	160	320	320	160
35	2014	0	160	10	20			5	5	5	320	160	10	10	80	5	40	40	80	80	80	20	5	80	5	160	20	10	10	20		5	5	40	5	320	160	80	20	80	80	5	5	10	5	40	160	10	80
35	2014	21	160	10	40			20	5	5	160	160	5	10	80	10	20	20	40	160	160	20	5	160	5	160	20	5	10	40		5	5	20	5	320	80	40	10	320	40	5	20	10	5	40	160	20	80
35	2015	0	160	5	40			10	5	5	5	80	5	20	40	5	10	20	10	80	10	10	5	80	5	5	5	5	10	40		5	5	20	5	80	160	40	5	40	40	5	5	5	5	10	320	5	80
35	2015	21	80	5	80			40	5	20	80	80	10	5	80	20	20	20	20	160	80	20	5	80	5	5	5	5	80	160		5	5	40	10	160	160	80	5	80	160	5	10	20	5	80	160	40	160
35	2016	0	160	20	20	5		20	5	5	80	80	5		40	5	10	20	20	40	40	10	5	160	5	5	5	10	20	40		5	5	40	5	40	160	80	5	40	40	10	160	5	5	40	20	10	40
35	2016	21	160	20	20	5		40	10	10	80	80	5		80	10	40	20	20	80	40	10	5	160	5	5	5	5	40	80		5	5	40	5	80	160	80	5	160	40	10	160	10	5	80	40	10	80
115	2015	0	320	20	160			320	80		640	160	80	160	320	80	10	160	320	160	80	40	160	320	40	160	80	640	20	320		40	80	160	80	160	640	80	40	320	160	5	160	40	160	80	160	160	160
115	2015	21	640	20	160			320	80		640	160	80	320	320	80	40	320	320	160	80	40	160	320	40	160	80	320	80	320		40	80	80	80	320	640	160	40	320	640	5	320	80	80	320	160	320	320
115	2016	0	640	20	80	80		320	80		320	80	80		320	80	40	160	320	160	80	40	160	320	40	40	80	160	40	320		40	40	160	80	160	640	80	80	160	160	20	320	40	80	160	320	160	320
115	2016	21	640	20	160	80		320	80		320	320	80		640	80	160	160	640	320	80	40	160	320	40	40	80	160	80	320		40	40	160	80	320	640	160	80	160	320	10	320	40	80	160	320	40	320
136	2014	0	40	5	5			20	5		20	10	5	10	10	5	20	10	5	20	10	40	10	80	20	40	40	20	10	10		20	20	20	20	10	10	20	20	20	40	10	20	40	5	80	10	80	10
136	2014	21	80	5	5			20	10		20	20	5	20	40	5	10	5	5	80	10	80	20	80	80	40	40	20	20	40		20	20	80	20	40	10	20	20	40	160	10	40	20	5	320	20	40	10
136	2015	0	20	20	10			5	5		20	10	5	20	20	5	10	20	5	10	20	40	20	20	20	20	5	20	10	20		20	10	40	10	10	40	10	5	40	20	5	40	20	5	10	10	40	20
136	2015	21	20	10	20			10	5		10	20	5	20	20	5	10	20	10	20	40	20	20	20	20	20	5	20	10	80		20	10	20	10	40	40	20	5	40	20	5	40	20	5	20	10	40	40
136	2016	0	40	5	10	5		10	5		20	20	5		20	5	10	20	10	20	20	20	20	20	20	5	5	10	5	20		10	10	40	10	20	40	10	10	40	20	5	40	10	5	20	40	20	40
136	2016	21	40	5	10	10		20	10		20	20	5		80	20	40	20	20	40	20	20	20	20	40	5	10	10	20	20		10	10	40	20	20	40	40	10	20	80	10	40	20	10	40	80	20	40
132	2014	0	160	5	40			80	10		80	320	20	20	320	40	20	40	640	320	40	20	5	80	80	20	20	20	40	320		160	5	40	5	320	10	80	5	320	160	10	40	20	20	80	20	40	40
132	2014	21	160	5	160			80	20		80	320	40	40	320	80	40	40	640	640	80	20	5	160	160	40	20	20	160	320		80	5	40	10	320	10	160	5	320	40	10	80	80	20	80	320	80	40
132	2015	0	40	5	160			40	5		40	160	20	5	320	40	20	80	640	160	80	5	5	10	40	5	5	40	20	320		40	5	20	5	10	80	80	5	320	40	5	10	20	10	40	80	20	80
132	2015	21	40	5	160			40	5		20	320	10	10	640	80	320	80	640	320	160	5	5	10	40	40	5	20	320	320		40	5	10	5	320	80	1280	5	320	320	5	80	160	10	320	160	320	80
132	2016	0	40	5	80	10		20	10		40	640	10		1280	160	80	80	1280	640	80	10	5	10	40	5	5	20	80	320		40	5	20	5	640	80	160	5	160	320	5	80	20	10	160	640	80	160
132	2016	21	40	5	160	10		40	10		40	640	20		1280	160	80	80	1280	640	160	10	5	10	40	5	5	10	80	320		40	5	20	5	640	80	160	5	160	320	5	80	20	10	160	640	20	160
16	2014	0	40	10	10			5	10	5	20	40	20	5	40	5	40	40	80	20	80	10	5	40	5	40	5	5	5	5		5	5	20	5	160	10	40	5	40	10	5	80	20	10	20	80	40	20
16	2014	21	80	20	20			5	10	5	20	40	20	10	40	10	40	40	80	40	80	5	5	40	5	40	10	5	10	10		5	5	20	5	80	10	80	5	40	80	5	80	40	10	20	40	40	40
16	2015	0	40	10	10			5	5	5	20	40	10	10	40	10	10	20	10	40	20	5	5	20	5	20	5	5	10	40		5	5	20	5	20	5	20	5	10	10	5	20	20	5	10	320	40	40
16	2015	21	40	10	20			10	5	10	10	80	10	20	80	20	20	20	10	40	40	5	5	10	5	40	5	5	20	40		5	5	20	5	40	5	40	5	20	20	5	20	40	5	20	80	80	80
16	2016	0	80	20	10	20		20	10	5	20	20	20		40	10	20	20	10	20	80	5	5	40	5	10	5	5	20	20		10	5	20	5	20	10	80	5	20	20	5	10	40	10	80	10	80	40
16	2016	21	80	20	10	20		40	20	10	20	40	20		80	10	80	20	10	40	40	10	10	40	5	10	5	5	40	20		10	5	20	5	40	10	80	5	40	40	5	10	40	10	160	20	80	40
24	2014	0	40	5	80			10	10	5	5	20	5	5	40	10	20	20	160	20	80	10	5	10	40	10	10	5	5	5		20	5	20	5	160	40	40	10	20	20	5	5	5	5	40	80	20	80
24	2014	21	40	5	160			20	20	20	5	80	5	5	160	40	20	20	320	160	80	20	5	10	5	20	10	5	20	40		20	20	40	10	160	40	40	10	160	80	5	10	5	5	80	80	80	320
24	2015	0	40	5	80			20	5	10	5	20	5	10	40	20	10	20	80	20	20	5	5	5	20	5	5	5	10	20		20	5	40	5	40	40	20	5	10	20	5	5	10	5	20	320	40	80
24	2015	21	40	5	160			40	5	20	5	80	5	20	80	40	40	20	80	80	80	5	5	10	20	80	5	5	160	80		20	5	20	5	80	40	160	5	40	320	5	10	20	5	160	160	320	320
24	2016	0	40	5	80	5		40	10	10	10	20	5		20	10	10	20	80	10	40	5	5	20	20	5	5	5	20	20		40	5	40	5	20	40	40	5	20	20	5	40	5	5	80	10	40	80
24	2016	21	40	10	80	10		40	10	20	10	40	5		80	20	160	20	80	20	40	5	5	40	40	10	5	5	160	40		40	10	40	5	40	40	320	5	40	320	5	40	40	5	320	20	80	80
31	2014	0	640	10	20			160	5	5	80	40	10	5	40	10	80	320	40	40	80	80	40	320	5	80	40	10	80	10		10	5	160	5	80	10	160	40	80	640	20	160	40	5	320	40	80	80
31	2014	21	320	80	40			160	5	5	80	80	10	10	80	10	80	320	40	80	80	80	10	160	10	160	80	10	80	20		10	5	160	5	160	10	320	20	160	1280	20	80	20	5	160	40	80	80
31	2015	0	160	40	40			5	5	5	320	40	5	20	40	10	20	640	10	40	20	40	5	40	5	5	5	5	20	40		5	5	160	5	20	5	40	10	20	40	5	20	10	5	20	320	20	80
31	2015	21	160	40	80			20	5	10	160	160	5	80	80	20	640	160	20	160	20	20	5	20	5	40	5	5	1280	160		10	5	160	5	160	10	1280	5	80	160	5	40	80	5	1280	160	320	160
31	2016	0	160	80	5	5		10	10	10	160	40	5		20	5	160	160	10	20	40	20	20	160	5	10	5	5	160	20		20	5	160	5	20	10	640	5	40	320	20	10	20	5	640	10	80	40
31	2016	21	160	80	40	5		20	10	10	160	40	5		80	10	320	320	20	40	40	40	20	320	10	10	10	10	160	40		20	5	160	5	40	10	640	10	40	640	20	10	20	5	640	20	80	80
72	2014	0	10	5	10			10	5		5	20	5	10	20	5	10	5	10	40	10	10	5	40	20	20	40	10	5	20		40	10	20	10	20	5	20	5	40	40	5	20	20	5	20	20	40	20
72	2014	21	20	5	40			20	10		10	80	5	10	40	20	10	5	40	320	40	20	5	40	80	20	40	10	40	160		40	10	40	20	80	10	20	5	160	40	10	40	20	5	80	40	40	80
72	2015	0	10	5	10			10	5		5	160	5	10	20	5	5	10	5	10	10	5	5	5	10	20	5	10	5	20		10	5	5	5	10	5	20	5	20	5	5	40	20	5	5	10	40	80
72	2015	21	10	5	40			10	5		5	80	5	20	80	10	10	10	20	80	10	5	5	5	20	20	5	10	20	160		10	5	10	5	80	10	40	5	160	40	5	80	40	5	40	40	40	80
72	2016	0	20	5	20	5		10	5		5	20	5		40	10	10	5	20	40	10	5	5	10	20	5	5	10	10	40		20	5	20	5	20	20	20	5	40	40	5	20	10	5	20	80	10	40
72	2016	21	20	5	40	5		20	5		5	160	5		160	20	20	10	40	160	20	5	5	10	20	5	5	10	10	160		20	5	20	5	160	40	40	5	160	40	5	20	20	5	20	320	20	160
130	2015	0	10	5	40			20	10		5	20	5	40	20	20	40	40	10	10	40	20	20	5	40	80	10	5	20	10		40	20	10	20	10	5	40	5	20	40	5	80	80	10	40	10	160	40
130	2015	21	10	5	40			40	10		5	40	5	80	40	10	80	80	20	20	80	20	20	5	40	40	20	5	40	40		40	20	10	20	40	10	160	20	40	80	5	80	160	10	80	20	160	40
130	2016	0	10	5	40	20		40	20		5	40	40		80	80	40	40	40	40	40	20	20	5	40	20	20	5	40	40		40	10	10	20	40	10	40	20	20	80	5	5	40	10	80	80	80	80
130	2016	21	10	5	40	20		40	20		5	40	40		80	80	80	40	40	40	40	20	20	5	40	20	20	5	80	40		40	10	20	20	40	10	80	20	40	160	5	5	80	10	80	80	80	80
33	2014	0	80	10	160			5	10	40	10	20	20	5	20	10	40	160	80	20	80	20	10	40	5	20	20	80	5	5		5	10	40	10	160	80	80	40	40	160	5	160	20	10	80	40	40	40
33	2014	21	80	10	160			10	20	40	10	40	20	5	40	20	40	160	40	80	80	40	10	40	5	40	20	80	10	10		5	10	40	10	80	80	80	20	80	640	5	160	20	10	40	40	40	40
33	2015	0	40	5	160			5	5	40	5	40	10	160	20	20	40	80	20	80	20	20	10	20	5	80	10	80	20	40		5	5	40	5	20	40	80	20	10	10	5	40	40	5	40	160	80	80
33	2015	21	40	5	160			20	10	40	10	40	20	160	40	20	80	80	40	80	40	20	10	10	5	80	10	40	80	40		5	5	40	5	40	40	160	20	10	40	5	80	80	10	160	160	160	80
33	2016	0	40	10	160	10		20	10	40	10	20	5		40	10	40	80	40	10	40	20	20	40	5	40	10	40	80	20		10	10	40	10	20	80	160	10	10	80	5	40	40	10	160	10	80	40
33	2016	21	40	20	160	20		80	40	80	10	20	20		40	20	160	160	40	20	40	40	20	40	10	40	20	80	160	20		20	20	40	10	20	80	320	10	40	320	5	80	80	10	640	20	160	40
82	2014	0	320	5	40			10	5		320	20	5	40	20	80	10	10	40	160	80	5	5	160	20	40	20	10	40	20		10	5	160	5	40	5	40	5	40	80	5	10	80	5	160	20	80	40
82	2014	21	320	10	320			20	10		320	80	10	80	80	320	80	10	160	160	320	5	5	320	160	80	80	10	320	160		20	10	160	10	80	5	160	20	80	80	5	40	640	10	320	40	1280	80
82	2015	0	80	10	80			20	5		320	20	5	80	40	80	5	20	80	20	80	5	5	20	5	40	5	5	20	20		5	5	80	5	20	20	10	5	20	40	5	80	40	5	40	10	80	40
82	2015	21	80	10	320			20	5		160	80	5	320	80	80	160	40	160	40	320	5	20	20	10	640	40	5	160	160		10	20	40	10	320	20	320	5	80	320	5	640	320	5	160	40	640	80
82	2016	0	80	10	80	5		10	5		160	40	5		80	160	20	20	160	80	80	5	5	20	10	20	5	5	40	20		10	5	40	5	80	40	40	5	40	80	5	20	40	5	80	40	80	80
82	2016	21	80	20	160	5		20	5		160	160	5		160	320	160	20	320	160	160	5	5	20	20	160	20	5	160	160		20	5	40	10	160	40	160	10	80	320	5	40	160	5	320	160	160	320
57	2014	0	5	5	80			20	10	80	5	10	20	5	10	80	20	80	320	10	160	20	20	5	5	5	40	10	5	5		5	10	5	20	160	5	40	40	10	5	5	80	10	20	5	80	10	40
57	2014	21	5	5	80			80	10	80	5	20	20	5	40	80	10	160	320	80	320	20	20	5	5	5	80	20	5	5		5	20	5	20	160	5	40	40	80	10	5	40	5	10	20	80	10	160
57	2015	0	5	5	80			40	5	80	5	20	20	40	40	80	5	160	160	10	80	10	10	5	5	5	5	20	5	10		5	20	5	20	20	5	10	10	10	5	5	20	5	10	5	160	5	160
57	2015	21	5	5	80			40	5	80	5	40	10	20	20	160	5	80	160	20	160	5	10	5	5	5	5	10	5	10		5	20	5	10	20	5	20	5	10	5	5	10	5	10	5	160	5	160
57	2016	0	5	5	80	10		80	20	160	5	20	20		20	40	20	80	160	10	80	10	40	10	5	5	10	20	10	10		20	20	10	20	20	5	80	5	5	10	5	5	5	20	40	10	10	40
57	2016	21	40	10	80	40		320	80	40	20	160	40		320	40	640	20	80	160	80	80	160	40	40	40	40	5	320	80		80	160	80	80	160	80	640	20	160	640	5	80	320	80	640	80	640	40
84	2014	0	40	5	40			10	20		10	20	20	20	20	40	5	5	40	80	40	80	5	20	5	20	160	20	10	40		10	20	40	40	20	10	5	10	40	80	10	5	10	10	80	20	40	40
84	2014	21	40	10	40			80	20		20	40	10	40	20	80	40	5	40	160	80	40	10	40	20	20	160	20	20	40		20	40	40	40	40	20	80	20	80	80	20	10	40	10	80	40	160	80
84	2015	0	10	10	40			20	5		10	40	5	20	20	20	20	5	80	20	40	5	20	10	5	20	5	20	5	40		5	20	20	20	20	10	40	5	40	10	5	20	40	5	10	20	40	40
84	2015	21	10	10	80			40	5		5	40	10	20	40	40	10	5	80	40	80	40	20	10	10	20	5	20	10	80		5	20	10	20	320	10	320	5	80	320	5	20	20	10	320	20	640	80
84	2016	0	20	20	40	20		40	10		20	80	10		80	80	10	5	160	40	40	40	10	20	10	10	5	20	5	40		10	10	20	20	40	20	80	10	40	80	10	10	10	10	40	80	40	160
84	2016	21	20	20	80	20		160	20		20	80	10		160	160	40	10	160	160	80	40	5	20	20	20	10	20	10	40		10	10	40	20	80	20	80	20	80	80	10	10	40	10	80	160	40	160
117	2014	0	10	5	20			5	20		5	40	20	10	80	20	10	10	40	160	20	40	10	40	5	20	20	10	40	20		10	10	10	10	80	10	40	5	40	20	10	5	80	40	40	20	80	20
117	2014	21	20	5	40			10	20		5	80	40	10	80	40	20	5	80	320	40	20	40	40	5	20	20	10	40	40		10	10	40	10	80	10	40	5	80	40	10	5	80	40	40	20	40	20
117	2015	0	5	5	20			5	10		5	40	20	10	80	10	5	20	80	40	40	20	5	5	5	40	5	10	10	10		5	5	5	5	80	5	20	5	20	20	5	40	20	40	10	5	40	20
117	2015	21	20	10	40			40	20		5	80	40	40	160	20	40	640	80	40	40	40	20	5	20	160	10	20	160	80		20	20	40	20	80	5	640	20	40	160	10	160	160	80	160	20	320	80
117	2016	0	10	10	20	20		5	10		5	40	40		80	20	10	40	80	40	20	20	10	5	5	10	5	10	20	20		10	5	10	10	40	5	80	5	20	80	5	10	20	20	40	20	40	40
117	2016	21	10	10	40	40		10	10		5	80	40		160	40	20	40	160	80	40	20	10	5	5	10	5	5	20	20		10	5	10	10	80	10	40	5	20	80	5	10	40	20	40	40	40	80
121	2015	0	40	5	5			10	10		10	10	80	20	20	5	5	20	10	10	40		5	5	20	5	5	5	5	20		20	5	20		20	20	20	5	20	5	5	20	20	40	5	5	5	20
121	2015	21	40	5	10			40	20		20	40	80	40	80	20	20	40	20	20	40		5	5	40	80	5	5	40	40		20	5	20		40	40	80	5	40	80	5	160	80	80	80	20	160	40
121	2016	0	40	5	5	40		20	20		20	20	80		40	10	5	20	20	20	20	5	5	5	20	5	5	5	5	10		20	5	20	5	20	40	10	5	40	20	5	40	5	40	10	40	10	20
121	2016	21	40	5	10	80		40	20		20	80	80		160	40	20	20	80	160	40	5	5	10	40	5	10	5	10	20		20	5	20	5	80	80	40	10	40	40	5	40	20	40	20	160	20	80
122	2013	0	10	10	160	20	160	40	10		10	40	80	320	80	20		20	40	80	80	5	160	20	40	5	320	5	40	20	10	40	80	20	10	80	10	320	160	80	80	5	160		80	80	20	640	320
122	2013	21	10	10	160	20	320	40	20		20	40	80	320	80	20		20	80	160	80	5	320	20	40	5	2560	10	80	20	10	80	160	10	20	80	10	160	160	80	160	5	20		80	80	40	640	80
122	2015	0	10	5	160			20	10		10	40	80	320	40	20	80	20	80	40	40	5	80	5	80	320	80	20	80	80		80	80	10	80	40	20	80	80	40	160	5	320	80	40	160	20	320	80
122	2015	21	10	10	320			80	20		20	80	80	640	80	20	80	40	80	80	80	5	160	10	80	640	160	20	320	160		160	160	10	160	160	20	320	80	160	640	5	1280	160	80	320	40	1280	80
122	2016	0	20	10	80	40		40	20		20	80	80		40	20	160	20	80	80	40	5	80	10	80	40	80	10	160	80		80	80	20	80	80	40	80	80	80	320	5	20	160	40	320	80	320	80
122	2016	21	20	10	160	40		160	20		5	80	80		160	80	320	20	160	80	80	5	160	10	80	160	80	10	320	80		80	80	40	80	80	40	640	80	80	640	5	20	320	80	320	160	320	160
15	2014	0	5	5	10			5	40	5	5	80	5	20	80	10	5	20	80	80	80	80	20	5	5	10	40	5	5	40		5	5	5	10	160	5	40	40	160	5	10	40	20	5	5	160	20	80
15	2014	21	5	5	20			20	80	10	5	160	5	40	160	10	80	20	160	320	160	80	20	5	5	20	40	5	10	80		5	5	5	10	320	5	320	40	320	640	10	80	40	5	80	320	40	160
15	2015	0	5	5	20			5	5	20	40	160	20	10	160	10	5	5	40	160	20	40	5	5	5	5	5	5	5	320		5	5	5	5	160	40	5	5	80	5	5	5	5	5	5	320	10	160
15	2015	21	10	5	40			40	40	20	40	320	20	80	320	20	160	10	80	640	80	40	5	5	5	160	20	5	80	320		5	10	5	5	320	40	320	10	320	160	5	160	320	20	160	320	320	320
15	2016	0	5	10	20	80		40	80	10	5	80	5		80	10	5	5	40	80	80	40	5	40	5	5	5	5	5	80		5	5	5	5	80	40	5	5	80	5	5	40	5	5	5	40	5	80
15	2016	21	5	10	80	80		80	80	80	40	160	20		320	40	320	5	80	160	80	40	5	40	5	80	5	5	160	160		5	5	5	5	160	40	320	5	160	320	5	40	160	20	320	160	160	160
47	2014	0	5	5	160			20	40	10	5	80	40	10	160	10	5	40	80	80	80	40	40	5	5	5	20	20	5	20		10	20	10	20	160	10	40	10	80	5	5	40	20	40	5	80	20	160
47	2014	21	10	5	160			40	20	20	5	80	40	10	160	20	20	40	160	160	80	80	20	5	5	5	20	20	10	20		5	20	10	20	160	10	40	40	160	80	5	40	20	40	40	80	20	160
47	2015	0	5	5	160			20	10	10	5	80	40	40	160	10	40	20	40	80	20	40	10	5	5	40	10	5	40	40		5	20	5	20	80	10	40	10	40	20	5	20	40	10	40	160	80	160
47	2015	21	5	5	160			40	10	20	5	160	20	40	160	20	320	10	40	160	40	40	10	5	10	80	10	5	320	80		5	20	5	10	160	10	320	10	80	320	5	80	160	10	320	160	320	320
47	2016	0	10	5	80	20		40	10	20	5	80	20		160	10	160	40	40	80	40	20	20	10	20	40	5	20	160	40		5	5	10	10	80	10	640	5	80	320	5	5	160	20	320	40	320	80
47	2016	21	10	5	160	20		80	20	20	5	80	20		160	10	320	20	40	80	40	40	40	10	20	40	5	10	160	80		20	20	10	10	80	10	640	5	160	320	5	5	160	20	640	40	320	80
85	2013	0	5	10	40			40				40			40	10		20	80	80	80	40		10		80	80	20	5	20				20		40	40	10	160	80	5	10	10			40	40	160	160
85	2013	21	5	10	40			40				40			40	10		40	80	160	80	40		20		80	80	20	20	40				40		40	40	80	80	160	20	10	20			80	40	160	80
85	2014	0	5	5	20			40	80		20	20	160	80	20	20	5	10	80	40	20	40	80	40	40	10	1280	40	10	40		40	10	80	20	40	10	20	80	40	5	10	20	80	320	80	40	80	20
85	2014	21	5	5	20			40	80		20	40	160	80	40	20	40	5	40	80	20	40	80	40	40	20	640	40	40	80		20	20	80	20	40	20	80	160	80	1280	20	20	160	160	1280	40	160	40
85	2015	0	5	5	20			40	20		5	20	160	160	20	10	5	10	80	10	20	40	5	5	40	80	80	20	5	40		5	5	20	5	20	5	5	80	40	5	5	80	40	160	80	20	160	40
85	2015	21	5	5	40			40	20		5	80	80	160	80	20	80	10	80	40	40	20	10	5	40	80	80	20	80	160		10	10	10	10	80	5	320	40	160	160	5	80	80	80	80	40	160	40
60	2014	0	5	80	10			20	20	5	5	80	40	5	20	10	80	20	40	80	80	40	40	5	20	10	40	10	40	10		20	10	5	20	160	10	160	20	40	320	5	320	20	40	640	80	320	40
60	2014	21	5	5	20			40	20	5	160	80	80	5	20	10	320	20	80	80	80	80	40	5	20	20	80	10	80	10		40	20	5	20	160	10	320	5	160	640	5	160	40	80	640	80	160	80
60	2015	0	5	5	10			80	10	5	5	40	40	80	20	10	40	10	20	40	20	40	20	5	20	40	20	5	40	40		20	10	5	20	20	10	80	5	20	40	5	20	20	40	80	80	80	40
60	2015	21	5	5	20			320	20	10	5	80	80	320	40	20	1280	10	20	80	40	80	20	40	160	320	40	5	2560	80		80	40	10	20	80	20	2560	20	40	2560	5	320	160	40	1280	160	1280	160
60	2016	0	10	10	5	80		160	40	5	5	40	80		20	10	320	20	20	20	40	40	80	10	40	40	20	10	320	40		160	10	20	20	20	20	1280	10	40	640	5	10	40	40	640	20	160	40
60	2016	21	5	10	80	80		160	40	80	5	40	40		40	40	640	20	40	20	160	40	40	5	80	80	20	10	320	40		80	20	10	10	20	20	640	20	40	640	5	10	80	80	640	20	320	40
63	2014	0	40	20	40			160	20	20	10	80	10	10	80	20	80	5	160	80	80	80	40	20	20	40	40	5	10	10		20	20	40	20	160	10	80	40	40	80	5	80	40	5	160	80	80	40
63	2014	21	20	20	160			160	160	80	10	320	20	40	640	80	320	20	320	640	160	80	40	20	40	20	40	5	40	80		40	80	40	40	320	20	160	40	320	640	10	640	160	20	640	160	160	160
63	2015	0	40	20	80			320	10	20	10	80	5	40	320	80	20	5	80	160	80	40	10	10	10	40	20	5	20	40		20	40	40	40	160	10	20	10	20	40	5	40	40	5	40	160	160	160
63	2015	21	40	40	160			160	5	80	5	160	5	160	640	160	320	10	160	320	160	40	10	20	10	640	20	5	640	160		20	20	40	20	320	10	320	5	80	640	5	640	1280	5	320	320	1280	160
63	2016	0	40	40	40	10		160	10	40	10	80	5		160	20	80	10	80	80	40	20	40	40	20	80	10	5	160	40		40	20	40	20	160	20	160	20	40	320	10	10	320	5	320	20	320	80
63	2016	21	40	40	320	20		320	20	160	20	640	10		640	160	160	10	640	320	320	40	40	40	40	160	20	5	320	160		40	40	80	20	320	20	160	20	160	640	10	20	320	10	640	80	320	160
56	2014	0	5	5	10			20	20	5	5	20	80	5	20	10	5	5	80	20	40	40	5	5	20	5	10	5	5	5		20	5	5	10	40	5	20	10	20	5	5	40	5	40	5	40	10	40
56	2014	21	5	5	40			160	40	20	10	160	160	40	160	20	40	5	80	320	80	40	20	5	40	10	20	5	20	80		80	10	5	20	160	10	160	40	160	640	5	80	20	80	160	80	320	80
56	2015	0	5	5	20			80	10	10	5	40	80	20	40	20	5	5	20	40	20	40	5	5	40	5	5	5	5	40		40	5	5	10	40	10	10	5	20	10	5	10	10	40	20	160	20	80
56	2015	21	5	5	40			80	20	20	10	160	40	40	80	40	80	5	40	160	40	40	20	10	20	80	10	5	80	80		20	20	5	20	80	10	320	20	80	160	5	40	80	40	160	320	320	160
56	2016	0	5	5	20	40		40	20	10	10	20	40		20	10	10	5	20	20	20	20	20	10	40	20	5	5	10	40		80	5	10	10	20	10	160	5	20	40	5	5	20	40	40	20	40	40
56	2016	21	5	10	40	40		80	40	20	10	40	40		40	20	80	5	40	40	40	20	20	5	40	10	10	5	40	40		160	20	10	20	40	10	160	5	40	80	5	10	80	80	80	20	80	40
58	2014	0	40	40	20			40	40	10	5	80	80	5	80	10	20	5	80	80	40	20	80	160	80	40	80	5	20	10		40	40	40	40	160	10	40	40	80	160	5	80	20	40	40	40	80	40
58	2014	21	20	40	20			80	80	10	5	80	160	20	160	20	40	5	80	160	80	40	80	40	40	160	160	5	20	20		80	40	40	40	160	10	80	160	160	320	5	40	20	80	160	40	160	80
58	2015	0	20	80	20			80	40	10	10	80	40	80	160	20	5	5	20	80	20	20	20	20	80	5	40	5	10	40		40	40	40	40	80	10	5	20	20	20	5	10	5	20	20	160	80	80
58	2015	21	5	5	80			40	10	40	5	160	20	20	640	80	40	5	80	320	40	5	40	40	40	80	10	5	80	320		10	40	10	5	320	5	320	5	160	80	5	20	160	5	80	320	320	320
58	2016	0	20	80	20	80		160	80	5	20	40	40		80	10	20	5	20	40	20	10	80	80	40	40	40	5	40	40		160	40	40	20	40	20	320	10	40	80	5	5	40	40	160	20	160	40
58	2016	21	80	160	160	80		320	80	160	10	80	80		160	80	160	10	80	80	160	20	80	160	80	40	80	5	320	40		160	40	160	40	80	40	640	20	40	640	20	10	320	80	640	20	640	80
64	2014	0	5	5	20			5	20	5	5	20	40	5	20	10	40	10	80	40	80	40	20	5	5	5	5	5	20	5		5	5	5	10	160	40	40	10	20	40	10	10	10	40	80	40	20	20
64	2014	21	10	5	20			10	40	5	5	40	40	5	40	20	80	20	40	80	80	80	20	5	5	5	5	5	80	10		5	10	5	10	80	20	160	20	80	640	10	80	20	80	640	40	80	40
64	2015	0	10	5	20			5	10	5	5	20	40	5	40	20	20	20	10	20	40	40	10	5	5	5	5	5	20	10		5	10	5	20	40	20	20	5	10	20	5	5	10	40	20	160	20	80
64	2015	21	5	5	20			5	5	10	5	40	20	5	40	20	40	20	10	40	40	5	10	5	5	5	5	5	10	40		5	5	5	5	40	10	160	5	20	20	5	5	20	10	20	160	20	80
64	2016	0	10	5	20	20		20	10	5	5	20	40		20	10	20	40	10	20	40	20	20	10	5	5	5	5	20	10		5	5	10	10	20	40	160	5	20	80	10	20	10	40	80	10	20	40
64	2016	21	10	10	40	20		80	20	20	5	40	40		40	20	160	80	40	40	80	20	20	10	20	20	5	10	160	20		5	10	20	10	40	40	320	10	40	320	10	20	80	40	320	20	160	40
32	2014	0	10	5	160			40	40	320	5	320	80	10	80	20	80	80	80	80	80	20	10	10	80	10	5	5	40	80		40	20	5	20	160	20	160	5	160	160	5	40	10	40	160	160	40	80
32	2014	21	10	5	160			40	80	320	5	320	40	20	160	40	80	80	80	320	80	10	10	10	160	10	5	5	80	160		40	40	5	20	160	20	160	5	320	640	5	80	20	40	160	160	80	160
32	2015	0	5	5	160			160	5	320	5	80	40	5	80	20	20	80	40	160	20	5	5	5	5	5	5	5	40	160		5	5	5	5	80	5	80	5	80	10	5	5	5	20	40	160	5	80
32	2015	21	5	5	160			160	20	320	10	160	40	5	80	40	80	80	40	160	40	5	5	5	40	40	5	5	160	160		40	10	5	10	160	20	320	5	80	10	5	40	40	40	320	160	160	160
32	2016	0	5	5	80	80		80	40	320	5	80	5		40	10	40	80	40	80	40	5	5	20	40	20	5	5	80	160		80	5	5	5	80	20	320	5	80	160	5	5	40	40	160	80	80	80
32	2016	21	20	5	160	80		320	80	320	5	320	5		160	80	640	80	80	320	80	5	40	20	40	40	5	5	320	1280		80	5	20	5	320	20	640	5	320	640	5	5	80	40	1280	160	160	80
83	2014	0	40	10	80			20	5		5	160	20	5	10	160	10	40	160	320	80	160	80	40	5	20	160	320	80	80		5	160	80	160	80	40	80	20	80	5	40	5	20	10	10	80	40	10
83	2014	21	80	10	160			160	10		5	160	20	20	40	160	320	40	160	320	160	160	160	80	160	40	160	320	640	80		40	160	80	160	80	40	640	40	320	20	40	40	80	20	160	160	320	20
83	2016	0	20	20	160	10		320	5		5	160	20		40	160	80	160	320	160	80	80	80	20	20	10	20	160	80	160		80	40	40	80	80	5	160	40	80	320	20	5	20	10	160	160	80	40
83	2016	21	20	40	320	20		640	5		5	320	20		40	160	1280	160	320	160	160	80	80	20	40	80	20	160	640	160		160	40	80	80	80	5	1280	40	160	2560	20	5	160	10	1280	160	160	80
101	2014	0	5	5	5			5	10		5	10	5	20	20	5	10	5	10	20	10	20	5	5	5	5	40	5	10	10		5	10	5	10	10	5	80	10	10	80	5	5	80	10	40	10	80	10
101	2014	21	5	5	5			10	20		5	10	10	40	20	10	20	5	10	40	20	40	20	5	10	5	40	5	40	40		5	20	5	20	20	5	160	5	40	80	5	10	160	20	40	20	40	20
101	2015	0	5	5	5			5	5		5	160	5	5	10	5	20	5	10	5	20	5	5	5	5	20	5	5	5	10		5	5	5	5	5	5	80	5	10	20	5	20	40	5	10	5	20	20
101	2015	21	5	5	40			10	20		5	80	40	20	80	10	40	10	40	80	80	40	40	10	40	80	20	5	20	160		5	40	40	40	80	5	160	10	160	40	5	80	160	40	40	40	80	80
101	2016	0	10	5	10	10		20	10		5	40	10		80	20	10	5	20	40	20	5	5	10	10	20	40	5	40	80		5	20	40	40	40	5	80	20	80	40	5	5	40	20	80	80	40	80
101	2016	21	5	5	20	10		20	20		5	80	10		160	40	20	5	80	160	20	5	5	10	10	20	20	5	20	80		5	20	40	40	80	5	80	20	40	40	5	5	40	20	40	80	40	160
92	2015	0	10	5	20			20	5		10	20	20	320	10	10	40	20	40	10	20	10	80	5	5	640	160	10	40	20		5	80	5	80	20	5	80	160	20	80	5	80	80	10	80	5	160	20
92	2015	21	10	10	80			80	20		40	80	40	640	80	40	160	20	160	80	80	40	80	10	40	640	160	20	160	160		20	80	20	80	40	5	640	160	160	640	5	640	640	40	320	80	640	80
92	2016	0	10	5	40	10		80	10		5	160	20		160	80	80	20	160	160	40	10	40	10	5	160	80	10	80	80		5	40	10	80	80	10	80	80	80	320	5	5	80	20	160	160	160	160
92	2016	21	10	5	80	20		160	20		10	80	40		80	40	160	40	160	80	80	20	40	10	20	160	80	10	160	160		20	40	20	80	80	10	160	80	80	640	5	5	160	20	320	80	160	80
4	2013	0	20	10	20	320	40	40	160		40	40	640	80	40	40		80	160	40	80	40	160	40	80	5	160	80	10	20	160	160	40	20	20	40	80		80	40	20	20	20		320	20	160	160	160
4	2013	21	20	10	20	320	20	40	160		20	80	640	80	160	40		80	80	80	80	160	80	10	160	20	80	40	10	80	80	160	40	10	20	80	40		20	80	80	40	10		320	40	160	80	320
4	2015	0	10	5	20			40	160	20	40	40	640	80	40	40	5	80	80	40	40	40	40	10	160	40	40	40	10	80		80	40	10	40	40	80	20	40	20	20	5	20	40	320	20	160	80	160
4	2015	21	10	5	20			40	160	20	40	80	640	40	80	40	5	80	80	80	40	40	40	10	160	40	40	40	10	80		80	40	20	40	80	80	40	40	40	40	5	20	40	320	40	160	80	160
4	2016	0	10	10	20	160		40	160	20	40	40	320		40	20	10	80	40	40	40	40	80	20	160	20	20	40	10	40		160	20	20	20	20	160	80	10	40	40	10	80	40	320	40	20	80	80
4	2016	21	20	40	20	320		80	160	40	40	40	320		80	20	80	80	80	40	80	160	160	40	160	20	40	40	40	40		320	40	40	40	40	160	160	20	40	160	40	80	80	320	160	20	160	80
27	2014	0	5	5	5			20	5	5	10	320	10	5	160	5	40	20	80	160	80	40	20	10	10	10	20	10	80	80		10	10	5	20	160	40	40	80	160	160	5	320	160	5	320	160	320	160
27	2014	21	10	10	20			320	80	10	10	640	40	80	640	20	80	20	40	640	80	80	40	10	40	10	40	20	160	320		40	80	10	40	640	40	160	80	640	640	10	640	160	20	320	640	640	320
27	2015	0	5	5	10			80	5	5	5	80	10	80	160	10	40	20	5	160	20	20	20	5	5	160	5	5	80	160		10	20	5	10	160	40	80	20	80	160	5	80	160	5	80	320	320	160
27	2015	21	5	5	20			160	5	10	5	320	20	40	320	40	320	10	10	320	40	20	20	5	20	160	5	5	640	320		20	20	20	20	320	20	1280	20	320	640	5	160	160	10	640	320	1280	320
27	2016	0	5	5	5	5		80	10	5	5	80	5		80	5	80	20	5	80	20	20	40	20	10	80	5	20	160	80		40	10	10	10	80	40	320	10	160	320	5	40	160	5	320	80	320	80
27	2016	21	20	20	80	20		160	20	40	10	160	10		160	40	640	20	40	160	80	20	40	40	20	80	20	10	320	320		40	20	40	20	160	40	1280	20	160	1280	5	40	320	20	1280	160	640	160
10	2014	0	20	10	10			5	10	5	5	80	10	10	160	10	40	10	80	80	80	40	40	10	5	20	80	5	10	20		5	10	10	10	160	20	80	80	160	40	5	80	10	10	40	80	20	80
10	2014	21	40	10	20			10	20	5	5	160	5	20	320	20	80	10	160	320	80	40	40	10	5	20	80	5	10	40		5	10	10	10	320	20	80	80	320	80	5	80	20	10	80	160	20	160
10	2015	0	10	5	10			5	5	5	5	80	10	40	80	10	10	10	10	80	20	10	20	5	5	20	20	5	10	80		5	10	10	5	80	10	20	20	40	10	5	20	10	5	10	160	40	160
10	2015	21	20	5	20			10	5	20	5	160	10	40	160	40	10	10	40	160	40	10	20	5	5	20	20	5	10	80		5	10	10	5	160	10	40	20	80	20	5	20	20	5	20	160	40	160
10	2016	0	20	10	5	10		10	10	10	5	80	10		80	10	10	10	20	40	80	10	80	20	5	10	10	5	10	40		5	10	10	10	40	20	80	10	40	20	5	20	10	10	40	20	20	80
10	2016	21	80	80	80	40		320	80	40	5	160	40		320	40	640	20	80	160	160	20	320	80	40	160	160	5	160	160		40	40	80	40	160	40	320	40	160	640	20	40	160	80	640	80	640	80
30	2014	0	80	5	10			5	5	10	5	40	5	5	40	10	40	40	160	20	40	20	80	10	5	20	40	40	20	10		5	20	10	40	160	5	80	80	80	160	5	160	80	5	80	80	160	40
30	2014	21	40	5	20			5	5	10	5	40	5	10	80	20	20	40	160	40	40	20	80	20	5	20	80	40	40	20		5	40	10	40	160	5	80	80	80	320	5	160	80	5	80	80	320	80
30	2015	0	20	5	20			10	5	10	20	40	5	40	40	20	10	40	40	40	20	10	40	10	5	40	40	20	40	40		5	20	20	20	40	5	40	20	20	20	5	40	20	5	40	160	160	80
30	2015	21	40	5	40			40	5	20	40	160	20	160	160	40	80	40	80	160	40	20	40	20	10	160	40	20	320	160		5	40	40	20	160	5	320	40	80	1280	5	160	320	10	320	160	640	160
30	2016	0	40	5	10	5		40	5	10	20	20	5		40	10	20	40	40	20	20	10	160	40	5	40	20	20	40	20		20	40	20	20	20	5	160	10	20	80	5	5	80	5	160	20	160	20
30	2016	21	40	20	40	20		80	40	20	40	40	10		80	20	320	40	160	40	40	20	160	40	10	40	40	20	80	40		20	40	20	40	80	10	160	10	80	160	10	10	80	20	320	40	160	40
134	2014	0	5	5	5			20	10		5	10	10	40	5	5	10	5	10	20	5	10	5	5	10	5	80	5	20	20		5	40	5	20	10	5	80	40	20	80	5	5	20	10	80	10	160	5
134	2014	21	5	5	40			80	20		5	40	20	80	40	40	40	5	80	160	40	40	40	5	80	5	160	5	160	80		20	40	5	40	40	10	320	80	80	80	10	40	80	20	320	40	160	10
134	2015	0	5	5	5			10	5		5	160	5	40	10	5	20	5	20	5	10	10	20	5	5	80	40	5	40	20		5	40	5	40	5	5	160	10	10	80	5	40	40	5	80	5	160	40
134	2015	21	5	5	10			80	10		5	40	20	80	40	80	40	5	40	40	20	20	80	5	20	160	20	5	80	160		20	80	5	80	40	40	640	40	80	320	5	80	80	20	160	40	320	40
134	2016	0	5	5	5	10		20	5		5	10	10		10	5	10	5	20	10	5	10	10	5	5	20	20	5	40	10		10	20	5	20	10	10	80	20	10	80	5	10	10	10	80	20	80	20
134	2016	21	5	5	40	20		160	40		5	80	40		80	80	80	5	320	80	40	20	10	5	20	40	80	5	80	20		40	40	10	80	80	80	320	40	20	160	5	80	20	40	160	80	20	40
59	2014	0	20	5	20			20	10	10	5	80	10	20	80	10	5	10	80	80	80	10	10	5	40	10	5	5	5	20		40	5	5	5	160	40	20	5	80	5	5	10	5	5	5	80	10	80
59	2014	21	20	5	20			40	10	10	5	80	5	20	80	10	10	10	80	160	80	10	10	5	40	20	5	5	5	20		20	5	10	5	160	40	5	5	160	20	5	10	5	5	20	80	20	80
59	2015	0	10	5	10			80	5	10	5	40	10	10	80	10	5	10	20	80	80	5	5	5	10	5	5	5	5	20		20	5	5	5	40	40	5	5	20	5	5	5	5	5	5	320	5	80
59	2015	21	10	5	20			40	5	20	5	80	10	10	160	20	5	5	20	160	80	20	5	10	5	5	5	5	5	160		20	5	5	5	160	40	10	5	80	10	5	5	5	5	5	320	10	320
59	2016	0	10	10	10	10		80	20	10	5	20	20		40	10	10	5	20	20	40	5	5	40	5	5	5	5	5	40		160	5	10	5	20	40	160	5	40	5	5	40	5	5	40	10	10	40
59	2016	21	20	20	160	40		160	40	160	5	80	40		160	80	40	10	160	80	160	10	40	80	80	10	10	5	20	80		640	20	20	20	40	160	80	5	80	20	10	160	20	40	80	40	40	40
96	2013	0	5	5	320	10	160	80	20		5	320	20	160	160	160		80	2560	640	320	40	80	5	40	5	160	40	80	160	20	80	20	5	40	320	20	160	80	320	80	5	160		20	160	160	640	640
96	2013	21	5	5	320	10	320	80	20		5	320	40	160	160	160		80	2560	1280	320	80	80	10	80	5	640	40	160	160	20	80	40	10	40	320	40	160	80	640	160	5	20		20	160	160	640	640
96	2015	0	5	5	320			80	10		5	320	20	320	640	80	80	80	1280	160	160	80	40	5	80	320	80	80	160	320		80	40	20	40	320	80	80	40	160	320	5	640	160	20	160	80	640	320
96	2015	21	10	5	320			80	20		5	320	20	640	320	160	640	2560	1280	320	320	1280	640	5	160	5120	640	5120	1280	640		80	640	80	640	40	80	5120	640	640	2560	160	5120	2560	20	2560	320	10240	320
96	2016	0	10	10	320	20		80	20		5	640	40		640	320	640	640	2560	640	160	640	160	5	80	320	160	640	160	320		80	80	80	160	640	160	640	160	160	640	40	80	320	20	640	320	1280	640
96	2016	21	20	10	640	20		80	40		5	640	40		1280	640	1280	640	5120	640	640	640	320	5	80	320	160	640	640	320		80	160	80	320	1280	160	1280	160	160	1280	40	80	1280	20	1280	640	1280	640
45	2013	0	5	5	10	5	5	5	5		5	10	5	5	10	10		5	160	5	160	5	5	5	5	5	5	5	5	10	20	5	5	10	5	10	5		5	40	5	5	5		5	5	80	5	10
45	2013	21	10	5	20	5	5	40	5		5	80	5	5	80	10		5	160	80	80	5	5	5	5	5	5	5	5	80	20	10	5	5	5	80	5		5	80	10	5	5		5	5	80	20	40
45	2015	0	5	5	10			5	5	5	5	80	5	5	40	10	10	5	80	40	10	5	5	5	5	5	5	5	5	5		5	5	5	5	10	5	40	5	20	80	5	5	10	5	5	160	5	80
45	2015	21	5	5	20			20	5	10	5	80	5	10	40	20	10	5	80	80	40	5	5	5	5	20	5	5	20	80		5	5	5	5	80	10	40	5	40	320	5	10	20	5	40	160	80	320
45	2016	0	10	5	5	5		20	10	5	5	20	5		10	10	10	5	80	40	80	5	5	10	10	5	5	5	10	10		20	5	10	5	20	20	80	5	10	20	5	10	5	5	40	20	10	40
45	2016	21	10	5	80	5		40	10	80	5	20	10		40	40	20	5	160	40	80	5	5	10	10	5	5	5	10	40		20	5	5	5	20	10	40	5	40	20	5	10	10	5	80	10	20	40
116	2013	0	10	20	40	20	40	80	40		5	20	80	160	10	10		5	640	80	160	5	10	80	40	10	320	5	5	20	40	80	5	80	5	20	80	5	80	80	5	5	80		40	10	40	160	80
116	2013	21	10	20	40	10	40	80	20		5	40	80	160	20	20		5	640	80	80	5	20	80	40	10	320	5	20	20	40	160	5	40	5	10	80	40	80	80	10	5	40		20	20	40	80	80
116	2014	0	10	10	20			80	40		5	20	80	160	10	10	20	5	320	80	40	5	5	160	20	20	640	5	10	40		160	5	80	5	5	5	80	80	40	20	5	80	80	20	40	40	320	20
116	2014	21	40	10	80			160	80		20	160	80	160	80	40	40	5	640	320	160	20	40	160	320	80	640	10	80	40		160	20	80	40	80	20	80	40	320	160	20	160	160	80	20	160	160	80
116	2015	0	5	20	40			80	10		5	40	40	80	40	20	40	5	320	40	80	5	5	10	40	160	40	5	160	40		80	5	40	5	10	40	160	20	80	320	5	160	40	5	160	20	160	40
116	2015	21	10	5	80			80	10		5	80	40	160	40	20	2560	10	320	40	80	10	5	5	80	320	40	10	2560	80		160	5	40	5	80	80	2560	40	80	5120	5	640	320	10	2560	40	640	80
124	2013	0	5	5	80			5				40			20	40		5	320	80	160	320		5		5	5	20	40	40				5		20	5	80	5	80	40	40	20			160	40	5	40
124	2013	21	5	5	80			10				40			40	40		5	320	160	160	320		5		5	5	10	40	40				5		40	20	80	5	160	40	40	10			80	40	5	80
124	2014	0	5	5	40			5	10		5	40	10	10	20	40	20	5	160	160	40	320	5	5	5	10	10	40	40	80		40	10	5	10	20	80	80	5	80	80	80	10	5	20	80	40	10	20
124	2014	21	5	5	40			5	20		5	40	20	10	20	40	20	5	160	160	80	320	80	5	5	10	10	40	40	80		20	10	40	20	20	80	80	5	160	1280	80	10	5	20	1280	40	5	20
124	2016	0	5	5	40	5		5	5		5	80	20		40	80	20	5	320	80	40	160	10	5	5	5	5	20	20	80		20	10	5	20	40	5	40	5	40	80	40	10	5	5	40	160	5	80
124	2016	21	5	5	40	5		5	5		5	80	20		40	80	40	5	640	80	40	320	5	5	5	5	5	5	40	80		20	5	10	10	40	5	80	5	40	80	40	5	5	5	80	160	5	80
<38 years old
12	2014	0	40	5	160			20	5	160	5	320	5	160	320	320	20	5	320	320	320	20	640	20	5	40	160	5	80	160		5	80	40	80	320	80	40	160	320	80	10	5	20	5	40	320	80	80
12	2014	21	5	5	320			40	5	160	10	320	10	160	640	320	80	5	320	640	320	20	160	10	10	20	160	5	160	160		5	80	20	20	320	80	80	80	320	160	20	5	40	10	160	320	80	160
12	2015	0	40	5	160			80	5	160	10	320	40	80	320	320	10	5	160	320	320	20	20	10	5	80	40	5	10	320		10	80	80	80	320	160	10	80	160	20	5	40	5	5	20	640	40	80
12	2015	21	40	5	320			80	5	160	5	160	5	160	640	320	20	5	320	320	320	20	40	10	5	160	80	5	40	320		5	80	40	80	640	160	80	80	160	40	5	40	40	5	40	320	160	160
12	2016	0	40	10	160	10		80	10	80	10	160	10		320	160	10	5	160	160	160	20	80	80	10	80	40	5	20	160		10	80	80	80	160	160	160	40	160	40	10	160	20	10	80	80	80	40
12	2016	21	80	80	320	40		320	40	320	20	320	40		640	160	640	5	320	320	320	40	320	80	80	160	160	5	320	320		20	160	160	320	320	160	320	160	320	640	40	160	320	40	640	160	320	80
3	2014	0	80	10	40			10	5	10	40	320	10	80	640	40	20	20	160	160	80	80	160	80	5	80	80	10	40	40		5	40	80	40	160	80	40	80	160	40	20	5	10	5	80	80	80	160
3	2014	21	40	10	40			5	5	20	40	320	10	80	1280	40	320	20	160	320	160	40	160	40	5	160	80	5	40	80		5	40	40	40	320	80	160	80	320	160	20	5	40	5	40	80	80	160
3	2015	0	160	20	40			10	5	20	40	160	10	80	320	40	10	20	80	160	40	40	40	80	5	40	20	5	10	160		5	40	160	40	160	160	20	20	80	20	5	40	10	5	20	320	80	160
3	2015	21	80	40	40			20	5	20	40	160	5	80	320	40	20	20	80	320	40	40	40	80	5	40	40	5	20	160		5	40	160	40	320	160	40	20	80	40	5	40	40	5	20	160	80	160
3	2016	0	320	80	40	5		20	10	20	40	160	10		320	20	20	40	80	160	80	80	160	320	5	40	40	20	20	80		10	40	160	40	160	320	160	20	40	40	20	320	20	10	40	40	160	80
3	2016	21	320	80	80	10		40	20	40	40	160	10		640	40	40	40	160	320	80	80	160	320	5	40	40	20	40	160		20	80	160	40	320	320	160	20	160	80	20	320	40	10	80	160	160	80
18	2013	0	40	20	20	5	40	20	5		5	160	5	320	320	20		5	40	160	80	5	20	320	5	40	320	5	40	80	5	10	80	320	160	160	5		160	160	40	5	80		5	80	160	320	160
18	2013	21	40	160	40	5	320	20	5		5	320	5	160	320	40		5	80	320	160	5	160	320	10	160	320	5	40	160	5	10	80	320	20	320	10		160	160	40	5	20		5	40	320	320	160
18	2014	0	20	20	20			40	5	10	5	160	5	320	320	20	160	5	80	160	80	10	320	80	5	80	320	5	160	40		10	80	80	20	320	5	80	160	160	160	5	5	80	5	160	160	320	160
18	2014	21	10	40	40			40	5	20	5	320	5	320	320	20	80	5	80	320	80	5	320	40	20	80	320	5	80	80		10	80	80	20	320	5	80	160	160	640	5	5	80	5	80	160	320	160
18	2015	0	20	80	20			40	5	20	5	160	5	160	320	20	20	5	40	160	40	5	40	80	5	160	40	5	40	160		5	80	160	80	320	10	20	80	80	40	5	40	40	5	40	320	160	160
18	2015	21	20	80	40			40	5	20	5	320	5	320	320	40	40	5	40	320	80	10	40	40	5	160	80	5	80	320		5	80	160	80	320	10	80	80	160	80	5	80	160	5	80	160	320	160
18	2016	0	20	80	20	5		80	10	20	5	160	5		160	10	40	5	40	160	20	10	160	160	10	80	40	5	40	80		20	80	160	40	160	20	80	20	80	80	5	10	80	5	80	80	160	80
18	2016	21	40	160	20	5		160	10	20	5	160	5		320	20	80	5	40	160	20	20	160	320	20	80	80	5	80	160		20	160	160	80	160	20	80	20	160	160	5	10	80	5	160	80	320	80
6	2013	0	20	5	80	5	80	40	5		5	640	5	320	640	40		5	640	640	80	5	5	40	5	5	320	5	80	320	5	5	160	5	320	640	5		160	320	80	5	80
6	2013	21	20	5	80	5	80	40	5		5	320	5	80	640	80		5	320	640	80	5	160	40	5	5	320	5	5	320	5	5	160	5	5	640	40		160	320	40	5	40
6	2014	0	20	5	80			80	5	40	5	640	5	320	1280	40	160	5	640	640	160	5	640	5	20	5	320	5	320	160		40	160	5	20	640	80	160	160	640	160	10	5
6	2014	21	5	5	160			80	5	40	5	640	5	160	1280	80	80	5	640	2560	160	5	640	5	5	5	320	5	160	320		40	160	5	5	640	80	40	160	640	640	5	5
6	2015	0	20	5	80			160	5	40	5	640	5	160	640	80	40	5	320	640	80	5	40	5	5	160	5	5	40	640		5	160	40	160	640	80	80	80	160	40	5	80
6	2015	21	20	5	160			320	5	40	5	320	5	160	1280	80	160	5	320	640	80	5	40	5	5	160	80	5	160	640		5	160	320	160	640	80	160	80	320	80	5	80
6	2016	0	5	5	80	5		80	5	40	5	320	5		640	40	40	5	320	320	80	40	160	40	5	80	80	5	80	640		40	80	40	80	320	160	160	5	320	160	5	80
6	2016	21	40	40	80	5		320	5	80	5	640	5		1280	80	640	5	640	640	160	40	320	40	40	160	160	5	320	640		80	320	80	320	640	160	320	80	640	640	5	160
1	2013	0	80	5	40	40	10	80	40		20	160	40	40	320	40		5	40	160	80	80	20	320	10	10	80	5	10	80	10	160	40	20	160	160	40		80	80	10	20	20		40	10	160	40	160
1	2013	21	80	10	80	40	80	40	40		10	160	80	40	320	160		5	80	160	160	80	80	320	10	40	160	5	20	80	10	160	80	20	20	160	80		80	160	20	40	80		40	40	320	80	160
1	2014	0	20	5	80			80	20	80	10	320	80	80	640	80	40	5	160	320	80	80	160	20	10	40	80	10	160	80		160	40	10	40	160	40	80	40	320	40	40	5	20	40	80	160	80	320
1	2014	21	20	5	320			160	20	320	10	640	80	80	1280	320	80	5	320	640	320	160	640	20	10	40	80	5	40	320		160	80	10	40	640	80	80	80	640	320	40	5	40	40	40	320	160	640
1	2015	0	40	5	80			80	20	80	10	320	80	80	320	80	10	5	40	320	80	80	20	40	80	40	10	5	10	160		80	80	10	40	320	160	10	20	160	20	10	40	10	20	20	320	40	320
1	2015	21	40	5	160			80	20	160	10	640	80	320	640	160	160	5	160	640	160	80	40	20	80	320	40	5	160	640		80	80	10	80	640	160	320	80	320	320	5	320	320	40	320	640	1280	640
40	2014	0	80	5	5			40	5	5	40	40	40	160	160	10	40	5	80	40	160	160	80	20	40	40	160	5	20	10		80	40	80	160	160	160	40	80	20	5	5	5	40	5	20	80	80	160
40	2014	21	5	5	320			5	5	160	5	1280	5	640	2560	320	160	5	160	640	160	160	320	5	5	5	320	5	160	160		5	80	5	320	640	5	160	160	640	5	5	5	80	5	5	320	640	640
40	2015	0	80	20	40			80	5	20	40	160	20	80	320	40	40	5	20	160	40	80	20	40	20	80	40	5	20	80		40	40	160	40	320	160	40	40	40	20	5	40	40	5	20	320	80	160
40	2015	21	80	40	80			160	5	40	40	160	20	160	320	80	80	5	20	160	80	80	40	20	40	160	80	5	160	160		40	40	80	40	160	160	80	40	80	80	5	80	80	5	80	160	160	160
40	2016	0	160	80	20	5		40	5	10	40	80	20		160	10	20	5	10	80	40	80	40	160	40	40	20	5	20	40		80	20	160	20	80	320	80	10	40	80	5	320	80	10	80	20	80	80
40	2016	21	160	40	80	10		160	5	40	40	160	20		320	20	80	5	20	160	80	80	80	80	40	40	40	5	40	80		80	40	160	20	80	320	80	20	160	80	10	160	80	20	160	80	80	80
5	2013	0	80	5	80	5	160	80	10		5	80	10	40	160	160		5	80	80	160	80	80	160	5	10	40	5	80	40	5	5	40	80	40	40	160		20	80	40	5	80		10	160	80	320	40
5	2013	21	80	20	160	10	640	40	10		5	160	20	80	160	320		5	80	80	320	160	40	80	10	20	80	5	160	80	5	5	80	80	80	80	160		40	80	80	10	80		10	80	160	640	40
5	2014	0	40	5	160			40	5	160	5	80	10	80	160	160	160	5	160	80	320	320	80	20	5	20	40	5	320	20		5	80	40	160	160	160	40	40	160	160	5	5	160	10	640	80	320	40
5	2014	21	20	5	160			40	10	160	5	80	20	80	160	160	160	5	160	160	320	80	40	10	10	10	40	5	640	40		5	40	10	40	160	80	80	20	160	1280	10	5	160	20	160	80	320	40
5	2015	0	40	5	160			40	5	160	5	80	10	40	160	160	40	5	80	80	160	160	20	10	5	160	160	5	80	160		5	40	40	40	80	160	40	5	40	80	5	80	160	5	80	160	320	80
5	2015	21	40	5	160			40	5	160	5	80	10	80	160	320	80	5	80	80	160	160	40	10	5	320	40	5	160	160		5	40	40	80	80	160	160	40	40	160	5	160	320	5	80	160	320	80
39	2014	0	40	10	20			80	5	20	10	160	5	320	320	40	40	10	160	160	80	10	640	40	5	80	320	5	160	40		10	80	40	40	320	5	80	40	160	320	20	5	80	5	80	320	160	320
39	2014	21	20	20	40			80	5	40	20	320	5	320	640	80	20	20	160	320	160	10	640	40	10	40	640	5	160	80		10	80	40	20	320	5	40	160	160	320	20	5	40	5	80	160	320	320
39	2015	0	80	40	40			160	5	20	20	160	5	320	320	40	20	10	10	320	20	5	40	80	5	160	80	5	40	80		5	80	40	80	320	5	40	80	80	40	5	80	40	5	40	320	160	320
39	2015	21	80	80	160			320	5	80	20	320	5	640	640	160	80	10	40	320	160	20	80	80	5	320	160	5	320	320		10	160	40	80	320	5	160	80	160	320	5	80	160	5	320	320	640	640
39	2016	0	80	80	40	5		160	5	40	20	160	5		320	40	20	5	20	160	80	5	320	160	5	160	40	5	80	160		10	40	20	40	160	5	160	40	80	160	10	10	80	5	160	80	160	160
39	2016	21	80	80	80	5		320	5	80	20	160	5		640	80	80	5	40	320	80	10	320	160	10	160	80	5	160	320		20	80	40	80	320	10	160	40	320	160	20	10	80	5	320	160	160	320
61	2013	0	20	10	40	5	80	80	5		5	160	5	320	320	40		5	80	160	80	40	80	320	20	20	320	5	40	80	5	10	80	160	160	160	160		160	160	80	5	80		5	160	160	320	160
61	2013	21	80	20	80	5	320	40	5		5	320	5	160	640	80		5	160	320	80	40	160	320	20	80	320	5	80	160	5	40	80	320	160	320	160		160	80	40	5	160		5	80	160	640	160
61	2015	0	40	10	40			80	5	20	5	160	5	160	320	40	40	5	40	160	40	40	40	40	5	160	80	5	80	160		20	160	80	160	160	160	40	20	80	80	5	160	80	5	80	160	320	160
61	2015	21	20	5	40			40	5	40	5	160	5	160	320	40	80	5	40	160	40	20	40	20	5	160	40	5	40	160		10	80	40	80	160	80	80	40	80	80	5	80	160	5	40	160	160	160
61	2016	0	40	40	40	5		80	10	20	5	80	5		320	40	80	5	40	80	40	40	80	80	10	80	80	5	80	80		40	80	80	80	80	320	160	20	80	160	5	160	160	5	160	40	320	80
61	2016	21	80	40	40	5		80	10	40	5	160	5		320	40	320	5	80	160	80	40	160	320	20	160	80	5	320	160		40	160	160	160	80	320	320	40	160	640	5	320	320	10	640	80	320	80
46	2014	0	20	5	80			80	5	40	5	320	5	160	320	40	80	5	80	320	160	20	1280	10	5	10	320	10	320	160		10	320	10	80	640	40	80	320	320	320	5	5	80	5	640	320	320	160
46	2014	21	5	5	160			80	5	160	5	320	10	160	640	160	20	5	160	640	320	20	640	5	10	10	320	10	320	160		10	160	10	80	640	40	80	160	640	640	5	5	20	10	640	320	320	160
46	2015	0	20	5	80			80	5	40	5	320	5	320	320	80	20	5	20	320	80	10	80	5	5	160	80	5	20	320		5	320	40	320	320	80	40	80	160	40	5	80	40	5	80	320	160	160
46	2015	21	20	5	80			80	5	80	5	320	5	320	640	160	160	5	40	320	160	10	80	5	5	320	80	5	80	640		10	320	20	320	320	80	320	80	160	320	5	160	160	5	320	320	320	320
46	2016	0	20	10	80	5		160	5	80	5	160	5		160	80	80	5	40	160	80	20	320	40	5	160	80	10	80	320		20	160	40	160	320	80	160	80	160	160	5	80	80	5	320	160	320	80
46	2016	21	20	10	80	5		160	5	80	5	160	5		320	40	80	5	40	160	80	20	320	40	5	160	80	10	80	320		20	160	20	160	320	80	160	40	320	160	5	80	80	5	320	160	320	80
50	2014	0	40	5	40			40	5	5	5	40	5	20	80	20	40	5	40	80	80	80	80	20	20	20	40	5	20	10		40	40	40	80	160	80	40	40	80	80	5	5	20	5	80	40	80	80
50	2014	21	10	5	40			40	5	10	5	80	10	20	160	20	20	5	80	80	80	40	40	10	40	40	20	5	40	20		40	20	20	40	320	40	20	20	160	160	5	5	20	5	40	80	40	80
50	2015	0	40	10	40			80	5	10	5	160	5	20	80	40	10	5	10	40	40	40	10	20	5	20	5	5	5	20		20	40	80	40	40	160	10	5	20	10	5	20	10	5	10	320	5	80
50	2015	21	40	20	80			80	5	20	5	80	10	20	160	80	20	5	10	80	160	40	20	20	20	40	5	5	40	80		40	40	80	40	80	80	160	5	40	80	5	40	40	5	80	160	160	160
50	2016	0	80	40	40	5		80	10	10	5	40	5		80	40	10	5	10	40	80	40	40	80	10	20	5	5	10	20		40	20	80	40	40	160	80	5	20	40	5	160	5	5	40	20	40	40
50	2016	21	40	20	40	5		160	10	20	10	80	10		160	40	40	5	10	40	80	40	40	80	20	20	10	5	20	40		40	40	80	40	40	160	80	5	80	40	5	160	20	5	80	20	80	40
13	2015	0	5	5	40			40	5	20	5	80	10	40	80	20	10	5	40	160	20	80	10	5	20	40	5	5	20	160		20	5	5	10	160	5	20	5	80	40	5	40	40	5	40	320	160	80
13	2015	21	5	5	160			160	10	80	5	160	20	80	320	160	160	5	80	320	80	80	10	5	40	640	40	5	640	320		40	10	5	10	320	5	640	40	80	640	5	640	640	10	640	160	2560	160
13	2016	0	5	5	40	10		40	10	20	5	80	10		80	10	40	5	40	40	40	80	40	5	20	40	10	5	80	80		40	10	5	10	80	5	160	5	40	160	10	5	80	10	80	40	160	40
13	2016	21	10	10	160	40		640	40	80	5	160	10		320	80	2560	5	160	160	160	80	80	10	80	320	160	5	1280	160		320	40	20	20	320	10	1280	80	320	2560	10	10	2560	40	2560	160	2560	160
41	2014	0	160	5	160			5	5	160	80	320	10	40	320	160	40	5	160	160	160	160	320	160	5	320	80	5	40	80		5	80	80	40	640	160	40	80	160	160	40	5	20	20	40	160	80	160
41	2014	21	80	5	320			640	20	160	160	320	40	160	320	160	160	5	160	320	320	160	1280	160	40	320	160	5	160	80		40	80	80	80	320	320	80	160	320	640	40	10	160	20	320	160	1280	320
41	2015	0	320	5	80			40	5	80	80	160	5	40	160	160	5	5	40	160	80	80	40	160	5	20	20	5	10	160		5	80	160	80	320	320	5	20	80	20	5	20	5	5	20	320	40	160
41	2015	21	320	5	160			80	5	80	80	160	5	40	160	160	40	5	40	160	160	80	40	160	20	80	40	5	40	160		5	80	160	80	160	320	160	40	80	80	20	80	80	5	80	160	160	160
41	2016	0	320	10	80	5		40	5	80	80	160	5		160	80	20	5	40	160	160	80	160	640	5	20	20	5	5	80		5	40	160	80	160	640	40	10	80	40	20	320	20	20	40	40	80	80
41	2016	21	320	20	160	20		160	20	160	80	160	5		320	80	320	5	40	160	320	80	320	320	40	160	80	5	160	160		20	160	160	160	160	320	160	80	320	320	40	320	160	40	320	80	320	80
51	2015	0	160	80	40			160	40	40	20	40	80	160	80	80	80	5	10	80	40	80	40	80	80	320	80	5	40	40		80	160	160	160	40	160	160	80	20	160	5	80	80	40	160	160	160	80
51	2015	21	160	80	160			160	20	160	20	160	80	640	320	160	640	5	40	160	160	160	40	80	80	1280	160	5	640	160		80	160	160	160	160	160	1280	160	80	1280	40	1280	1280	40	640	320	2560	320
51	2016	0	80	80	40	40		160	40	40	10	40	40		80	80	320	5	20	80	80	80	80	160	80	160	80	5	320	40		5	80	160	80	40	160	640	40	40	320	20	160	320	40	640	20	640	40
51	2016	21	160	80	80	40		320	80	80	10	80	40		160	80	640	5	20	80	80	80	80	320	80	320	80	5	640	80		80	160	160	80	80	160	640	80	80	640	40	160	320	80	1280	40	640	40
11	2013	0	5	5	80	20	20	80	40		5	80	20	10	80	80		5	80	80	160	80	20	20	10	5	20	5	10	20	5	20	10	10	20	80	5		10	80	20	20	20		40	10	160	40	40
11	2013	21	5	5	320	40	20	80	40		5	320	40	10	320	320		5	320	320	320	80	20	40	20	10	40	5	40	80	5	40	20	20	20	320	10		10	160	40	40	10		40	40	160	40	80
11	2014	0	5	5	160			80	80	80	5	160	40	20	160	160	40	5	160	80	160	320	20	5	40	10	10	5	20	20		20	20	5	20	160	20	80	20	160	160	20	40	10	40	80	160	40	40
11	2014	21	5	5	320			80	80	80	5	160	40	20	320	320	40	5	160	160	320	160	20	5	40	10	10	5	20	40		20	20	5	20	320	10	160	20	160	320	20	40	20	40	640	80	20	80
11	2015	0	5	5	160			160	20	160	5	160	20	20	160	160	40	5	80	160	160	160	10	5	20	10	5	5	20	80		20	10	5	10	160	10	80	5	40	40	5	20	20	20	20	320	20	80
11	2015	21	5	5	160			160	40	160	5	160	20	20	160	160	80	5	80	160	160	160	20	5	20	40	5	5	80	160		20	20	10	20	160	10	160	20	80	80	20	40	40	20	80	160	80	80
11	2016	0	5	10	80	20		80	40	80	5	80	10		80	80	40	5	80	80	160	80	40	10	20	10	5	5	40	40		40	20	10	20	80	20	160	5	40	80	20	10	10	20	80	20	40	40
11	2016	21	10	20	160	40		320	80	160	5	80	20		160	160	160	5	80	160	160	80	80	20	20	20	10	5	160	80		80	40	20	20	80	20	320	10	160	320	20	20	40	40	320	40	80	40
62	2015	0	10	5	80			40	5	80	5	80	20	20	80	160	5	5	40	40	160	320	5	5	5	5	5	5	5	20		10	20	10	40	80	80	5	20	20	20	10	20	10	10	20	160	40	320
62	2015	21	10	10	320			160	80	320	5	320	40	640	320	640	320	160	160	320	640	1280	160	80	20	1280	320	80	640	640		40	640	40	320	320	80	1280	160	320	1280	160	320	640	40	640	640	2560	320
62	2016	0	5	10	80	20		40	40	80	5	40	5		40	40	40	40	40	20	80	320	80	20	5	80	80	20	40	20		40	80	20	80	40	80	320	20	20	160	40	40	40	20	320	10	160	80
62	2016	21	20	5	160	20		40	40	80	5	40	20		80	80	40	20	80	40	160	160	80	40	5	40	40	20	80	40		40	80	20	80	40	80	320	20	80	320	40	80	80	40	320	20	320	80
19	2014	0	5	5	5			5	5	5	5	5	5	5	10	5	5	5	80	80	80	5	5	5	5	40	5	5	5	5		5	5	5	5	160	5	5	5	80	5	5	5	5	5	5	160	5	5
19	2014	21	5	10	5			5	5	5	5	5	5	5	5	5	5	5	80	160	160	5	5	5	5	80	5	5	5	5		5	5	5	5	160	5	80	5	160	5	5	5	5	5	5	80	320	5
19	2015	0	80	5	40			5	5	5	5	160	5	80	160	5	5	5	10	160	5	40	5	40	5	40	5	5	20	80		5	5	5	5	160	5	5	5	10	5	5	5	5	20	5	320	80	80
19	2015	21	80	5	40			80	5	5	5	320	20	160	320	5	40	5	10	320	5	40	5	5	5	40	5	5	40	320		5	5	5	40	320	5	80	5	80	40	5	40	80	20	40	160	160	80
19	2016	0	80	40	40	20		80	5	5	5	80	5		80	10	5	5	10	80	80	5	80	80	5	5	5	5	5	80		40	5	40	5	80	5	80	5	5	40	5	5	40	5	5	10	80	40
19	2016	21	80	40	40	40		40	5	5	5	160	5		160	20	40	5	10	160	80	5	80	80	40	5	5	5	40	80		40	5	40	5	160	5	80	5	80	160	5	5	80	40	80	10	160	80
17	2014	0	5	5	320			20	80	320	5	160	10	20	320	1280	80	80	80	80	640	160	40	5	5	5	20	160	20	20		10	10	5	10	160	5	80	40	160	80	20	160	40	20	160	80	320	80
17	2014	21	5	10	640			20	80	640	5	160	5	40	640	1280	40	80	160	160	640	160	40	5	80	5	40	160	40	80		20	20	5	10	160	5	80	80	160	640	20	160	80	40	160	160	320	160
17	2015	0	5	5	640			40	10	640	5	160	10	40	320	640	20	80	80	160	640	80	10	5	10	40	10	160	40	80		5	5	5	10	160	5	20	5	40	40	5	40	40	20	40	320	160	160
17	2015	21	5	5	640			40	10	640	5	80	10	80	320	640	80	80	40	160	640	160	20	5	10	80	20	80	80	80		20	20	5	20	160	5	160	20	40	160	5	40	80	20	80	80	160	160
17	2016	0	5	5	640	20		40	20	640	5	80	5		160	640	20	80	40	80	640	80	40	5	5	20	5	160	40	40		40	10	5	10	80	5	160	5	40	80	20	5	40	20	80	40	40	80
17	2016	21	5	5	640	40		160	40	640	5	80	20		320	320	80	80	40	80	640	80	40	5	20	40	40	160	160	80		40	20	5	20	80	5	320	10	80	320	20	5	80	20	320	40	160	80
49	2014	0	5	5	40			5	40	40	5	40	20	5	320	40	20	40	80	20	80	640	10	5	5	5	20	10	5	5		5	10	5	10	160	10	40	20	40	5	40	40	10	40	5	40	5	640
49	2014	21	10	5	160			80	160	80	10	640	320	40	640	160	160	80	160	640	160	640	10	10	5	10	160	20	40	160		40	40	40	40	320	640	160	160	640	320	40	320	80	320	320	320	80	1280
49	2015	0	5	5	80			20	20	80	5	80	40	40	160	80	5	40	40	80	80	160	5	5	5	5	5	5	5	40		5	10	5	10	320	40	20	5	40	10	20	5	5	20	10	160	5	320
49	2015	21	5	5	80			40	20	80	5	320	40	40	320	80	80	80	40	320	160	320	10	5	5	40	20	5	80	320		5	20	10	20	320	40	320	20	320	160	40	40	40	40	160	320	80	320
49	2016	0	5	5	80	40		40	40	80	5	80	20		160	80	20	40	40	40	80	160	20	5	5	5	5	10	5	40		10	10	5	10	160	20	40	5	80	20	20	20	5	40	40	40	10	160
49	2016	21	5	5	80	40		80	40	80	5	80	40		160	80	40	40	40	80	80	160	20	10	10	10	20	10	40	160		20	20	10	10	160	40	160	5	160	80	40	20	10	40	80	40	20	160
25	2014	0	5	5	160			20	20	160	5	320	20	20	640	160	40	80	160	320	320	20	5	5	20	5	10	80	10	80		20	5	5	5	320	10	40	20	320	40	5	80	20	10	80	160	80	160
25	2014	21	5	5	320			20	20	320	5	320	20	20	320	160	80	80	160	320	320	20	5	5	40	10	20	40	20	80		20	5	5	5	320	10	80	20	320	80	10	80	40	20	80	160	80	80
25	2015	0	5	5	160			40	10	160	5	160	20	20	320	160	40	40	80	320	320	10	5	5	20	20	5	40	20	160		20	5	5	5	320	10	40	5	80	20	5	20	40	10	20	160	40	80
25	2015	21	5	5	160			40	10	160	5	160	20	20	320	160	80	40	80	320	160	20	5	5	20	40	5	40	40	160		20	5	5	5	320	10	160	5	80	40	5	20	160	10	40	160	80	160
25	2016	0	5	10	160	10		40	20	160	5	160	20		320	160	40	40	40	160	160	10	20	10	20	10	5	40	40	160		40	5	10	5	160	20	80	5	80	40	5	10	40	20	80	80	40	80
25	2016	21	5	20	160	20		80	40	160	5	160	20		320	160	80	40	80	160	160	10	40	20	40	10	10	40	80	160		40	5	10	5	160	20	160	5	80	80	5	10	40	20	160	80	40	80
44	2014	0	5	5	10			40	40	5	5	80	80	5	80	10	80	160	40	80	80	20	5	5	5	5	5	80	5	20		40	5	5	5	160	10	40	5	80	5	5	5	10	80	20	160	5	80
44	2014	21	5	5	160			40	80	80	5	320	80	40	320	80	5	160	160	320	160	20	5	5	5	5	5	80	10	160		40	5	5	5	320	20	40	5	640	40	5	20	10	80	80	320	5	160
44	2015	0	5	5	40			80	20	20	5	160	40	5	160	20	5	160	10	160	20	10	5	5	40	5	5	40	5	160		40	5	5	5	160	5	20	5	80	5	5	5	5	20	5	320	5	80
44	2015	21	5	5	40			80	20	20	5	80	40	5	160	40	20	80	20	160	40	20	5	5	40	5	5	40	80	160		40	5	5	5	160	5	80	5	80	40	5	5	10	20	40	160	20	160
44	2016	0	5	5	20	40		40	20	20	5	80	20		80	10	10	80	10	80	80	10	5	5	40	5	5	80	5	80		80	5	5	5	80	10	80	5	40	20	5	5	5	40	40	40	10	40
44	2016	21	5	5	40	40		80	40	40	5	80	40		160	20	80	80	20	160	80	20	40	5	40	5	5	80	80	160		80	5	5	5	80	10	160	5	160	80	5	5	10	40	160	80	20	80
2	2014	0	10	20	320			5	40	160	5	320	80	40	320	160	80	40	160	320	320	40	20	10	5	20	80	5	20	160		5	5	40	5	320	5	80	80	640	80	5	160	40	20	160	320	160	80
2	2014	21	10	40	320			5	40	160	5	320	80	40	320	320	160	40	160	320	320	40	40	10	10	20	80	5	40	160		5	5	40	5	320	5	80	80	320	320	10	80	80	40	160	320	160	160
2	2015	0	5	20	160			10	10	160	5	160	20	160	160	160	20	40	80	320	160	20	10	5	5	80	20	5	20	320		5	5	40	5	320	5	10	20	160	40	5	40	40	20	40	320	160	160
2	2015	21	5	20	320			10	10	160	5	160	20	160	320	320	80	40	80	320	160	80	20	5	5	80	40	5	160	320		5	5	40	5	320	5	160	40	160	320	5	80	160	10	160	640	640	160
2	2016	0	10	40	160	20		20	20	160	5	160	20		160	160	40	40	40	160	160	20	40	20	5	40	20	10	40	320		10	5	80	5	80	10	160	10	160	160	10	5	80	20	80	160	160	80
2	2016	21	10	40	160	40		80	40	320	5	160	20		160	160	160	40	80	160	320	20	40	20	10	40	40	10	80	320		20	10	40	5	160	10	160	20	160	160	10	5	80	20	160	160	160	80
53	2015	0	5	5	10			20	5	10	5	40	10	20	40	10	10	5	10	80	20	20	20	5	5	5	20	20	5	40		5	20	5	10	40	5	40	10	20	10	5	5	5	10	5	320	5	80
53	2015	21	5	5	20			40	5	20	5	80	10	20	80	20	40	5	20	80	20	20	20	5	5	5	10	5	40	80		5	10	5	5	80	5	80	5	40	80	5	10	5	10	80	320	40	160
53	2016	0	5	5	10	10		40	20	10	5	40	10		40	10	40	5	10	40	40	20	80	5	5	5	10	20	40	20		10	20	5	10	40	5	160	5	20	40	5	5	5	10	160	20	20	20
53	2016	21	5	5	40	20		80	20	40	5	80	10		80	20	160	5	20	80	40	20	80	5	5	5	20	10	160	80		20	20	5	10	80	10	320	5	80	160	5	5	40	20	320	40	40	40
48	2014	0	160	10	160			40	80	160	20	160	40	20	320	160	20	160	160	320	160	20	80	80	10	40	20	20	5	80		20	20	80	20	320	160	40	40	160	640	10	80	40	40	160	160	80	160
48	2014	21	160	40	320			80	80	320	40	320	80	40	320	160	80	160	160	320	320	40	80	5	20	80	40	40	80	160		20	20	80	20	320	320	80	160	640	1280	5	160	40	80	640	320	320	160
48	2015	0	80	20	160			40	20	160	20	320	40	40	320	160	20	80	40	320	80	20	20	20	20	20	10	20	10	160		20	20	80	20	160	80	40	20	160	80	5	20	20	20	40	640	80	160
48	2015	21	160	20	160			80	20	160	20	320	40	160	320	160	40	320	80	320	160	40	80	20	20	320	40	40	160	320		20	40	80	20	160	80	320	80	160	160	5	80	80	20	640	320	1280	320
48	2016	0	80	20	80	40		40	40	160	20	80	20		160	80	20	160	40	160	160	10	160	80	20	80	20	40	40	160		40	20	80	20	160	80	320	40	160	80	5	80	40	40	160	80	160	80
48	2016	21	80	40	160	40		80	40	320	20	160	40		160	80	160	160	80	160	160	20	160	80	40	80	40	20	160	160		40	20	80	20	160	80	160	40	160	320	5	80	160	40	320	80	320	80
7	2015	0	10	5	80			160	5	40	5	1280	5	160	2560	80	10	5	320	2560	80	5	80	5	20	160	80	5	40	640		5	320	40	160	1280	80	20	80	640	80	5	80	40	5	80	640	320	640
7	2015	21	10	5	80			80	5	40	5	1280	5	160	2560	80	40	10	320	1280	40	10	80	5	20	320	160	5	160	640		5	320	40	320	1280	80	160	160	640	320	5	160	80	5	320	640	640	640
7	2016	0	20	5	40	5		160	5	20	5	640	5		1280	40	80	5	320	640	40	10	320	10	20	80	80	5	160	640		10	160	40	160	640	80	160	40	320	320	5	80	80	5	320	320	320	320
7	2016	21	20	5	80	5		320	10	40	5	640	5		1280	40	160	5	320	640	80	10	320	10	40	80	80	5	160	640		20	320	40	320	1280	80	320	40	320	320	5	80	80	5	320	320	320	320
43	2015	0	5	5	40			80	10	20	5	160	20	80	160	40	20	5	10	160	40	40	20	5	20	80	20	5	20	160		20	40	5	40	160	10	20	20	80	20	5	20	40	10	40	320	80	80
43	2015	21	5	5	40			80	10	40	5	160	20	160	80	80	40	5	20	160	80	40	20	5	20	160	40	5	80	320		20	80	5	40	160	10	80	40	160	80	5	80	80	10	80	320	160	160
43	2016	0	5	5	40	10		80	20	20	5	80	20		40	20	40	5	10	80	40	40	80	5	20	40	20	5	40	80		40	40	5	40	80	10	80	10	80	40	5	10	80	20	80	40	80	40
43	2016	21	5	10	40	20		80	20	40	5	80	20		80	40	80	5	20	160	80	40	80	10	40	40	40	5	40	160		40	40	10	40	80	10	80	10	160	80	5	10	80	20	160	80	160	80
20	2014	0	20	5	20			160	5	5	5	640	5	1280	1280	20	1280	5	640	640	80	80	2560	10	20	5	1280	5	1280	160		40	640	5	160	640	80	160	640	640	640	5	5	640	5	1280	640	2560	160
20	2014	21	5	5	640			160	5	320	5	1280	5	640	1280	320	640	10	1280	1280	320	40	1280	5	40	5	1280	5	1280	320		40	320	5	160	1280	40	160	320	1280	2560	5	5	640	5	1280	640	1280	320
20	2015	0	20	5	40			320	5	20	5	640	5	640	1280	40	160	5	320	640	40	40	160	5	10	640	320	5	320	640		5	640	40	640	640	80	5	160	320	320	5	320	320	5	320	640	1280	160
20	2015	21	20	5	80			320	5	40	5	640	5	640	1280	80	320	5	320	1280	80	40	160	5	5	640	320	5	640	640		5	640	40	320	1280	160	160	160	320	640	5	320	640	5	640	640	1280	320
[truncated: 3 more columns]
